# Supplementary material for: A Geospatial Approach to Energy Planning in Aid of Just Energy Transition in Small Island Communities in the Philippines
Source: MDPI journal article supplement (doi:10.3390/app112411955), 2021-12-15
Supplement: s1 [file s1]

**Table S1.** Summary of research studies on energy planning using GIS.

| References | RE Technologies       |                 |                |                       |                |                |                            |                       | Applications           |                                                           |                                                                         | Applied Technique | Location         |                             |
|------------|-----------------------|-----------------|----------------|-----------------------|----------------|----------------|----------------------------|-----------------------|------------------------|-----------------------------------------------------------|-------------------------------------------------------------------------|-------------------|------------------|-----------------------------|
|            | Biomass/<br>Bioenergy | Geother-<br>mal | Solar PV       |                       | Hydro<br>power | Ocean/<br>Wave | Wind                       |                       | Hydrogen<br>Production | RE resource<br>availability and<br>energy poten-<br>tials | Suitable loca-<br>tion for the en-<br>ergy infrastruc-<br>ture facility |                   |                  | Electric network<br>design  |
|            |                       |                 | Land-<br>based | Offshore/<br>Floating |                |                | Land-<br>based/<br>Onshore | Offshore/<br>Floating |                        |                                                           |                                                                         |                   |                  |                             |
| [95]       |                       |                 |                |                       |                |                |                            | X                     |                        | X                                                         | X                                                                       |                   | AHP-PROMETHEE-II | Egypt                       |
| [96]       |                       |                 |                |                       |                |                |                            | X                     |                        | X                                                         | X                                                                       |                   | DEMATEL          | Taiwan                      |
| [97]       |                       |                 | X              |                       |                |                |                            |                       |                        | X                                                         | X                                                                       |                   | AHP-EQW-BWM      | Algeria                     |
| [98]       | X                     | X               | X              |                       |                |                | X                          |                       |                        | X                                                         | X                                                                       |                   | ANP-Fuzzy-WLC    | Eastern Regions, Iran       |
| [99]       |                       |                 |                |                       |                | X              |                            |                       |                        | X                                                         | X                                                                       |                   | GIS-MCDA         | Southwestern Black Sea      |
| [100]      |                       |                 |                |                       |                |                | X                          |                       |                        | X                                                         | X                                                                       |                   | AHP              | Knjazevac, Serbia           |
| [101]      |                       |                 | X              |                       |                |                |                            |                       |                        | X                                                         | X                                                                       |                   | AHP              | Algeria                     |
| [102]      |                       |                 | X              |                       |                |                |                            |                       |                        | X                                                         | X                                                                       |                   | GIS-MCDA         | Sweden                      |
| [103]      |                       |                 |                |                       |                |                |                            | X                     |                        | X                                                         | X                                                                       |                   | AHP              | Crete Island, Greece        |
| [41]       |                       |                 | X              |                       |                |                |                            |                       |                        | X                                                         | X                                                                       |                   | AHP-WLC          | Central Anatolia, Turkey    |
| [34]       |                       |                 |                |                       |                |                |                            |                       |                        |                                                           |                                                                         | X                 | GIS-MILP         | Milan                       |
| [104]      |                       |                 | X              |                       |                |                |                            |                       |                        | X                                                         | X                                                                       |                   | AHP              | Ecuador                     |
| [105]      |                       | X               |                |                       |                |                |                            |                       |                        | X                                                         | X                                                                       |                   | AHP              | Changbai Mountain,<br>China |
| [105]      |                       |                 | X              |                       |                |                | X                          |                       |                        | X                                                         | X                                                                       |                   | AHP              | India                       |
| [107]      |                       | X               |                |                       |                |                |                            |                       |                        | X                                                         | X                                                                       |                   | GIS              | Gulf of Suez, Egypt         |

**Table S1.** Summary of research studies on energy planning using GIS (cont'n.).

| References | RE Technologies       |                 |                |                       |                |                |                            |                       | Applications           |                                                           |                                                                         | Applied Technique | Location                     |                                              |
|------------|-----------------------|-----------------|----------------|-----------------------|----------------|----------------|----------------------------|-----------------------|------------------------|-----------------------------------------------------------|-------------------------------------------------------------------------|-------------------|------------------------------|----------------------------------------------|
|            | Biomass/<br>Bioenergy | Geother-<br>mal | Solar PV       |                       | Hydro<br>power | Ocean/<br>Wave | Wind                       |                       | Hydrogen<br>Production | RE resource<br>availability and<br>energy poten-<br>tials | Suitable loca-<br>tion for the en-<br>ergy infrastruc-<br>ture facility |                   |                              | Electric network<br>design                   |
|            |                       |                 | Land-<br>based | Offshore/<br>Floating |                |                | Land-<br>based/<br>Onshore | Offshore/<br>Floating |                        |                                                           |                                                                         |                   |                              |                                              |
| [108]      |                       |                 |                |                       |                |                | X                          |                       |                        | X                                                         | X                                                                       |                   | Fuzzy TOPSIS-Fuzzy<br>COPRAS | Massachusetts                                |
| [109]      |                       |                 |                |                       | X              |                |                            |                       |                        | X                                                         | X                                                                       |                   | GIS                          | Estonia, Europe                              |
| [70]       | X                     |                 |                |                       |                |                |                            |                       |                        | X                                                         | X                                                                       |                   | GIS-MCDA                     | Mexico                                       |
| [110]      |                       |                 | X              |                       |                |                | X                          |                       | X                      | X                                                         | X                                                                       |                   | FVIKOR-FTOPSIS               | Iran                                         |
| [111]      |                       |                 |                |                       | X              |                |                            |                       |                        | X                                                         | X                                                                       |                   | GIS                          | Ardebil Province, Iran                       |
| [71]       |                       |                 | X              |                       |                |                |                            |                       |                        | X                                                         | X                                                                       |                   | AHP                          | West Bengal, India                           |
| [112]      |                       |                 | X              |                       |                |                |                            |                       |                        | X                                                         | X                                                                       |                   | GIS-MCDA                     | Kuwait                                       |
| [43]       |                       |                 |                |                       |                |                | X                          |                       |                        | X                                                         | X                                                                       |                   | AHP-WLC                      | Mauritius                                    |
| [113]      |                       |                 |                |                       |                |                | X                          |                       |                        | X                                                         |                                                                         |                   | GIS                          | China                                        |
| [114]      | X                     |                 |                |                       |                |                |                            |                       |                        | X                                                         |                                                                         |                   | GIS                          | Campania Region, South-<br>ern Italy         |
| [33]       |                       |                 |                |                       |                |                |                            |                       |                        |                                                           |                                                                         | X                 | GIS                          | Namanjavira, Mozam-<br>bique                 |
| [15]       |                       |                 |                |                       |                |                |                            | X                     |                        | X                                                         | X                                                                       |                   | GIS                          | Portugal, Spain, & France                    |
| [11]       |                       |                 | X              |                       |                |                |                            |                       |                        | X                                                         | X                                                                       |                   | GIS-MCDA                     | French Guiana                                |
| [10]       |                       |                 | X              |                       |                |                |                            |                       |                        | X                                                         | X                                                                       |                   | GIS                          | Pakistan                                     |
| [49]       |                       |                 |                |                       |                |                | X                          |                       |                        | X                                                         | X                                                                       |                   | AHP-TOPSIS                   | Eastern Macedonia &<br>Thrace region, Greece |

**Table S1.** Summary of research studies on energy planning using GIS (cont'n.).

| References | RE Technologies       |                 |                |                       |                |                |                            |                       | Applications           |                                                           |                                                                         | Applied Technique | Location        |                                              |
|------------|-----------------------|-----------------|----------------|-----------------------|----------------|----------------|----------------------------|-----------------------|------------------------|-----------------------------------------------------------|-------------------------------------------------------------------------|-------------------|-----------------|----------------------------------------------|
|            | Biomass/<br>Bioenergy | Geother-<br>mal | Solar PV       |                       | Hydro<br>power | Ocean/<br>Wave | Wind                       |                       | Hydrogen<br>Production | RE resource<br>availability and<br>energy poten-<br>tials | Suitable loca-<br>tion for the en-<br>ergy infrastruc-<br>ture facility |                   |                 | Electric<br>network<br>design                |
|            |                       |                 | Land-<br>based | Offshore/<br>Floating |                |                | Land-<br>based/<br>Onshore | Offshore/<br>Floating |                        |                                                           |                                                                         |                   |                 |                                              |
| [115]      |                       |                 | X              |                       |                |                |                            |                       |                        | X                                                         | X                                                                       |                   | AHP             | Souss-Massa, Southern Morocco                |
| [116]      | X                     | X               | X              |                       |                |                | X                          |                       |                        | X                                                         |                                                                         |                   | GIS             | Kwazulu-Natal province, South Africa         |
| [74]       |                       |                 |                |                       |                |                | X                          |                       | X                      | X                                                         | X                                                                       |                   | AHP             | Adrar, Algeria                               |
| [77]       |                       |                 | X              |                       |                |                |                            |                       |                        | X                                                         | X                                                                       |                   | AHP             | Mediterranean                                |
| [117]      |                       |                 | X              |                       |                |                |                            |                       |                        | X                                                         | X                                                                       |                   | GIS-OWA         | Iran                                         |
| [118]      |                       |                 |                |                       |                |                | X                          |                       |                        | X                                                         | X                                                                       |                   | GIS             | Poland                                       |
| [119]      | X                     |                 |                |                       |                |                |                            |                       |                        | X                                                         | X                                                                       |                   | GIS             | Kuudestaan, South Osthrobos-<br>nia, Finland |
| [120]      |                       |                 |                |                       |                |                | X                          |                       |                        | X                                                         | X                                                                       |                   | GIS-MCDA        | Thrace, Greece                               |
| [72]       | X                     |                 | X              |                       |                |                | X                          |                       |                        | X                                                         |                                                                         |                   | GIS-MCDM        | Southern Spain                               |
| [121]      |                       |                 | X              |                       |                |                |                            |                       | X                      | X                                                         | X                                                                       |                   | AHP             | Algeria                                      |
| [122]      |                       |                 | X              |                       |                |                |                            |                       |                        | X                                                         | X                                                                       |                   | AHP-Fuzzy VIKOR | Pakistan                                     |
| [57]       |                       |                 | X              |                       |                |                |                            |                       |                        | X                                                         | X                                                                       |                   | GIS-MCA         | Arizona, USA                                 |
| [123]      |                       |                 | X              |                       |                |                |                            |                       |                        | X                                                         | X                                                                       |                   | AHP             | Iran                                         |
| [124]      |                       |                 | X              |                       |                |                | X                          |                       | X                      | X                                                         | X                                                                       |                   | GIS             | Sistan & Baluchistan, Iran                   |
| [125]      |                       |                 | X              |                       |                |                | X                          |                       |                        | X                                                         | X                                                                       |                   | AHP             | Songkhla, Thailand                           |
| [126]      |                       |                 | X              |                       |                |                | X                          |                       |                        | X                                                         | X                                                                       |                   | Fuzzy TOPSIS    | Fars, Iran                                   |

**Table S1.** Summary of research studies on energy planning using GIS (cont'n.).

| References | RE Technologies       |                 |                |                       |                |                |                            |                       | Applications           |                                                           |                                                                         | Applied Technique | Location    |                               |
|------------|-----------------------|-----------------|----------------|-----------------------|----------------|----------------|----------------------------|-----------------------|------------------------|-----------------------------------------------------------|-------------------------------------------------------------------------|-------------------|-------------|-------------------------------|
|            | Biomass/<br>Bioenergy | Geother-<br>mal | Solar PV       |                       | Hydro<br>power | Ocean/<br>Wave | Wind                       |                       | Hydrogen<br>Production | RE resource<br>availability and<br>energy poten-<br>tials | Suitable loca-<br>tion for the en-<br>ergy infrastruc-<br>ture facility |                   |             | Electric network<br>design    |
|            |                       |                 | Land-<br>based | Offshore/<br>Floating |                |                | Land-<br>based/<br>Onshore | Offshore/<br>Floating |                        |                                                           |                                                                         |                   |             |                               |
| [127]      |                       |                 |                |                       | X              |                |                            |                       |                        | X                                                         | X                                                                       |                   | GIS         | Kunhar River, Pakistan        |
| [88]       |                       |                 |                |                       | X              |                |                            |                       |                        | X                                                         | X                                                                       |                   | TOPSIS      | Iran                          |
| [14]       |                       |                 |                |                       |                | X              |                            | X                     |                        |                                                           |                                                                         |                   | GIS         | Portugal                      |
| [46]       |                       |                 | X              |                       |                |                |                            |                       |                        | X                                                         | X                                                                       |                   | AHP         | Malatya Province, Tur-<br>key |
| [128]      |                       |                 |                |                       |                |                | X                          |                       |                        | X                                                         | X                                                                       |                   | IT2-FAHP    | Nigeria                       |
| [129]      |                       |                 |                |                       |                |                |                            | X                     |                        | X                                                         | X                                                                       |                   | GIS         | China coast                   |
| [130]      |                       |                 |                |                       | X              |                |                            |                       |                        | X                                                         |                                                                         |                   | GIS-MCDM    | Gesso & Vermenagna<br>Valleys |
| [131]      |                       |                 | X              |                       |                |                |                            |                       |                        | X                                                         | X                                                                       |                   | GIS-MCDM    | China                         |
| [132]      |                       | X               |                |                       |                |                |                            |                       |                        | X                                                         | X                                                                       |                   | GIS-Overlay | Egypt                         |
| [133]      |                       |                 | X              |                       |                |                |                            |                       |                        | X                                                         | X                                                                       |                   | GIS-MCDM    | West Africa                   |
| [134]      |                       |                 | X              |                       |                |                |                            |                       |                        | X                                                         | X                                                                       |                   | AHP         | Turkey                        |
| [135]      |                       |                 | X              |                       |                |                |                            |                       |                        | X                                                         | X                                                                       |                   | AHP         | Eastern Morocco               |
| [68]       |                       |                 |                |                       |                |                | X                          |                       |                        | X                                                         | X                                                                       |                   | GIS-MCDM    | Iran                          |
| [136]      | X                     |                 |                |                       |                |                |                            |                       |                        | X                                                         |                                                                         |                   | GIS         | Poland                        |
| [53]       |                       |                 |                |                       |                |                |                            | X                     |                        | X                                                         | X                                                                       |                   | GIS         | Canary Islands                |
| [13]       | X                     |                 |                |                       |                |                |                            |                       |                        | X                                                         | X                                                                       |                   | GIS-Overlay | Boston, Massachusetts         |
| [50]       |                       |                 | X              |                       |                |                |                            |                       |                        | X                                                         | X                                                                       |                   | AHP-TOPSIS  | Haryana, India                |



**Table S1.** Summary of research studies on energy planning using GIS (cont'n.).

| References | RE Technologies       |                 |                |                       |                |                |                            |                       | Applications           |                                                           |                                                                         | Applied Technique | Location                      |                                       |
|------------|-----------------------|-----------------|----------------|-----------------------|----------------|----------------|----------------------------|-----------------------|------------------------|-----------------------------------------------------------|-------------------------------------------------------------------------|-------------------|-------------------------------|---------------------------------------|
|            | Biomass/<br>Bioenergy | Geother-<br>mal | Solar PV       |                       | Hydro<br>power | Ocean/<br>Wave | Wind                       |                       | Hydrogen<br>Production | RE resource<br>availability and<br>energy poten-<br>tials | Suitable loca-<br>tion for the en-<br>ergy infrastruc-<br>ture facility |                   |                               | Electric network<br>design            |
|            |                       |                 | Land-<br>based | Offshore/<br>Floating |                |                | Land-<br>based/<br>Onshore | Offshore/<br>Floating |                        |                                                           |                                                                         |                   |                               |                                       |
| [66]       |                       |                 | X              |                       |                |                | X                          |                       |                        | X                                                         | X                                                                       |                   | GIS-MCDA                      | Afghanistan                           |
| [80]       |                       |                 |                |                       |                |                | X                          |                       |                        | X                                                         | X                                                                       |                   | AHP-VIKOR-OCRA-<br>TOPSIS-OWA | Andean Region, Ecuador                |
| [36]       |                       |                 |                |                       | X              |                |                            |                       |                        | X                                                         | X                                                                       |                   | GIS                           | France                                |
| [75]       |                       |                 | X              |                       |                |                |                            |                       |                        | X                                                         | X                                                                       |                   | AHP-Fuzzy                     | Khuzestan Province, Iran              |
| [137]      | X                     |                 |                |                       |                |                |                            |                       |                        | X                                                         |                                                                         |                   | GIS                           | Kurdistan Province,<br>Northwest Iran |
| [138]      |                       | X               |                |                       |                |                |                            |                       |                        | X                                                         | X                                                                       |                   | Genetic Algorithm             | Iran                                  |
| [139]      |                       |                 |                |                       | X              |                |                            |                       |                        | X                                                         | X                                                                       |                   | GIS                           | Sakarya Basin, Turkey                 |
| [140]      |                       |                 | X              |                       |                |                |                            |                       |                        | X                                                         | X                                                                       |                   | AHP                           | Apeldoorn, The Nether-<br>lands       |
| [40]       |                       |                 | X              |                       |                |                |                            |                       |                        | X                                                         | X                                                                       |                   | AHP                           | Sub-Saharan Africa                    |
| [141]      |                       |                 |                |                       | X              |                |                            |                       |                        | X                                                         | X                                                                       |                   | GIS                           | Europe                                |
| [81]       |                       |                 |                |                       |                |                | X                          |                       |                        | X                                                         | X                                                                       |                   | AHP                           | Saudi Arabia                          |
| [35]       |                       |                 |                |                       |                | X              |                            | X                     |                        | X                                                         | X                                                                       |                   | AHP                           | Greece                                |
| [12]       | X                     |                 |                |                       |                |                |                            |                       |                        | X                                                         | X                                                                       |                   | AHP-WLC                       | Hervas, Spain                         |
| [142]      | X                     |                 |                |                       |                |                |                            |                       |                        | X                                                         |                                                                         |                   | GIS                           | Northwest Europe                      |

**Table S2.** *Reclassification values of exclusion criteria and constraints.*

Reclassification values for GHI.

| <b>Global radiation (kWh/m<sup>2</sup>/day)</b> | <b>Score</b> | <b>Suitability rating</b> |
|-------------------------------------------------|--------------|---------------------------|
| 0 – 3.56                                        | 0            | Not suitable              |
| > 3.56                                          | 1            | Suitable                  |

Reclassification values for wind speed.

| <b>Wind speed (m/s)</b> | <b>Score</b> | <b>Suitability rating</b> |
|-------------------------|--------------|---------------------------|
| < 5.5                   | 0            | Not suitable              |
| 5.5 – 6.5               | 1            | Suitable                  |
| ≥ 6.5                   | 2            | Highly Suitable           |

Reclassification values for slope.<sup>7</sup>

| <b>Slope (°)</b> |             | <b>Score</b> | <b>Suitability rating</b> |
|------------------|-------------|--------------|---------------------------|
| <b>Solar PV</b>  | <b>Wind</b> |              |                           |
| 0 - 1            | 0 - 5       | 4            | Highly suitable           |
| 2 - 3            | 6 - 10      | 3            | Moderately suitable       |
| 4 - 5            | 11 - 15     | 2            | Marginally suitable       |
| > 5              | > 15        | 1            | Not suitable              |

Reclassification values for aspect.

| <b>Direction</b> | <b>Aspect (°)</b> | <b>Score</b> | <b>Suitability rating</b> |
|------------------|-------------------|--------------|---------------------------|
| Flat             | -1                | 4            | Highly suitable           |
| North            | -1 – 22.5         | 1            | Not suitable              |
| Northeast        | 22.5 – 67.5       | 1            | Not suitable              |
| East             | 67.5 – 112.5      | 1            | Not suitable              |
| Southeast        | 112.5 – 157.5     | 2            | Marginally suitable       |
| South            | 157.5 – 202.5     | 4            | Highly suitable           |
| Southwest        | 202.5 – 247.5     | 3            | Moderately suitable       |
| West             | 247.5 – 292.5     | 1            | Not suitable              |
| Northwest        | 292.5 – 337.5     | 1            | Not suitable              |
| North            | 337.5 - 360       | 1            | Not suitable              |

Reclassification values for electric networks.

| <b>Distance (m)</b> | <b>Score</b> | <b>Suitability rating</b> |
|---------------------|--------------|---------------------------|
| 100 – 1,000         | 4            | Highly suitable           |
| 1,000 – 3,000       | 3            | Moderately suitable       |
| 3,000 – 5,000       | 2            | Marginally suitable       |
| <100 and > 5,000    | 1            | Not suitable              |

Reclassification values for roads.

| <b>Distance (m)</b> |                   | <b>Score</b> | <b>Suitability rating</b> |
|---------------------|-------------------|--------------|---------------------------|
| <b>Solar PV</b>     | <b>Wind</b>       |              |                           |
| 100 – 1,000         | 500 – 1,000       | 4            | Highly suitable           |
| 1,000 – 3,000       | 1,000 – 3,000     | 3            | Moderately suitable       |
| 3,000 – 5,000       | 3,000 – 5,000     | 2            | Marginally suitable       |
| < 100 and > 5,000   | < 500 and > 5,000 | 1            | Not suitable              |

Reclassification values for built-up areas.

| <b>Distance (m)</b> |                     | <b>Score</b> | <b>Suitability rating</b> |
|---------------------|---------------------|--------------|---------------------------|
| <b>Solar PV</b>     | <b>Wind</b>         |              |                           |
| 500 – 1,000         | 1,000 – 1,500       | 4            | Highly suitable           |
| 1,000 – 3,000       | 1,500 – 2,000       | 3            | Moderately suitable       |
| 3,000 – 5,000       | 2,000 – 2,500       | 2            | Marginally suitable       |
| < 500 and > 5,000   | < 1,000 and > 2,500 | 1            | Not suitable              |

Reclassification values for water bodies.

| <b>Distance (m)</b> | <b>Score</b> | <b>Suitability rating</b> |
|---------------------|--------------|---------------------------|
| < 100               | 4            | Highly suitable           |
| 100 – 300           | 3            | Moderately suitable       |
| 300 – 500           | 2            | Marginally suitable       |
| > 500               | 1            | Not suitable              |

Reclassification values for land use/land cover.

| <b>Land use/land cover</b> | <b>Score</b> | <b>Suitability rating</b> |
|----------------------------|--------------|---------------------------|
| Annual crops               | 0            | Not suitable              |
| Brush/shrubs               | 1            | Suitable                  |
| Fishpond                   | 0            | Not suitable              |
| Grassland                  | 1            | Suitable                  |
| Inland water               | 0            | Not suitable              |
| Mangrove forest            | 0            | Not suitable              |
| Open forest                | 0            | Not suitable              |
| Open/barren land           | 1            | Suitable                  |
| Perennial crops            | 0            | Not suitable              |

**Table S3.** *Result of Holt-Winters Exponential Smoothing Method for Araceli.*

| Month & Year   | Forecasted Data       |              |              |              |              |
|----------------|-----------------------|--------------|--------------|--------------|--------------|
|                | <i>Point Forecast</i> | <i>Lo.80</i> | <i>Hi.80</i> | <i>Lo.95</i> | <i>Hi.95</i> |
| January 2022   | 82.28796436           | 75.13730686  | 89.43862186  | 71.35197743  | 93.22395129  |
| February 2022  | 100.7046188           | 93.38296002  | 108.0262775  | 89.50710801  | 111.9021295  |
| March 2022     | 101.0131806           | 93.49308189  | 108.5332793  | 89.51218211  | 112.5141791  |
| April 2022     | 112.816993            | 105.0704841  | 120.563502   | 100.9697299  | 124.6642561  |
| May 2022       | 116.055811            | 108.0547397  | 124.0568823  | 103.8192284  | 128.2923936  |
| June 2022      | 114.4947456           | 106.2110862  | 122.7784051  | 101.8259818  | 127.1635095  |
| July 2022      | 104.5466649           | 95.9527764   | 113.1405535  | 91.40344661  | 117.6898833  |
| August 2022    | 106.3622948           | 97.43112649  | 115.2934632  | 92.70325155  | 120.0213381  |
| September 2022 | 109.4782819           | 100.1835273  | 118.7730365  | 95.26318146  | 123.6933824  |
| October 2022   | 106.2531943           | 96.56939806  | 115.9369905  | 91.44310599  | 121.0632826  |
| November 2022  | 109.4917326           | 99.39435604  | 119.5891092  | 94.04912776  | 124.9343375  |
| December 2022  | 121.8799637           | 111.3454167  | 132.4145108  | 105.7687643  | 137.9911631  |
| January 2023   | 85.69774015           | 74.32302404  | 97.07245626  | 68.30161306  | 103.0938672  |
| February 2023  | 104.1143946           | 92.27363119  | 115.9551579  | 86.00550969  | 122.2232794  |
| March 2023     | 104.4229564           | 92.09475831  | 116.7511544  | 85.56860447  | 123.2773083  |
| April 2023     | 116.2267688           | 103.3905917  | 129.0629459  | 96.59552996  | 135.8580076  |
| May 2023       | 119.4655868           | 106.1016985  | 132.8294751  | 99.02728343  | 139.9038902  |
| June 2023      | 117.9045214           | 103.9939653  | 131.8150776  | 96.63016165  | 139.1788812  |
| July 2023      | 107.9564407           | 93.48099471  | 122.4318867  | 85.81815647  | 130.094725   |
| August 2023    | 109.7720706           | 94.71420527  | 124.829936   | 86.74305285  | 132.8010884  |
| September 2023 | 112.8880577           | 97.23089338  | 128.545222   | 88.94249126  | 136.8336241  |
| October 2023   | 109.6629701           | 93.39023529  | 125.9357049  | 84.77596984  | 134.5499703  |
| November 2023  | 112.9015084           | 95.99749928  | 129.8055176  | 87.04905738  | 138.7539595  |
| December 2023  | 125.2897395           | 107.7392813  | 142.8401977  | 98.44862999  | 152.130849   |
| January 2024   | 89.10751594           | 70.55765739  | 107.6573745  | 60.73795543  | 117.4770764  |
| February 2024  | 107.5241703           | 88.31084464  | 126.7374961  | 78.13992439  | 136.9084163  |
| March 2024     | 107.8327322           | 87.94156169  | 127.7239026  | 77.41181209  | 138.2536522  |
| April 2024     | 119.6365446           | 99.0535785   | 140.2195107  | 88.15761443  | 151.1154747  |
| May 2024       | 122.8753626           | 101.5870494  | 144.1636758  | 90.31769709  | 155.4330281  |
| June 2024      | 121.3142972           | 99.30745896  | 143.3211355  | 87.6577425   | 154.9708519  |
| July 2024      | 111.3662165           | 88.62802513  | 134.1044079  | 76.59115371  | 146.1412793  |
| August 2024    | 113.1818464           | 89.6998014   | 136.6638915  | 77.26915764  | 149.0945352  |
| September 2024 | 116.2978335           | 92.05974137  | 140.5359256  | 79.22887046  | 153.3667965  |
| October 2024   | 113.0727459           | 88.06670131  | 138.0787904  | 74.82930094  | 151.3161908  |
| November 2024  | 116.3112842           | 90.52565236  | 142.0969161  | 76.8755634   | 155.747005   |
| December 2024  | 128.6995153           | 102.1229156  | 155.276115   | 88.05411356  | 169.344917   |

**Table S3.** *Result of Holt-Winters Exponential Smoothing Method for Araceli (cont'n.).*

| Month & Year   | Forecasted Data       |              |              |              |              |
|----------------|-----------------------|--------------|--------------|--------------|--------------|
|                | <i>Point Forecast</i> | <i>Lo.80</i> | <i>Hi.80</i> | <i>Lo.95</i> | <i>Hi.95</i> |
| January 2025   | 92.51729173           | 64.84138339  | 120.1932001  | 50.1906425   | 134.843941   |
| February 2025  | 110.9339461           | 82.45349579  | 139.4143965  | 67.3768561   | 154.4910362  |
| March 2025     | 111.242508            | 81.94644656  | 140.5385693  | 66.43804845  | 156.0469675  |
| April 2025     | 123.0463204           | 92.92379903  | 153.1688417  | 76.97789944  | 169.1147413  |
| May 2025       | 126.2851384           | 95.32551638  | 157.2447604  | 78.93648247  | 173.6337943  |
| June 2025      | 124.724073            | 92.91690672  | 156.5312393  | 76.07920998  | 173.368936   |
| July 2025      | 114.7759923           | 82.11102494  | 147.4409597  | 64.81923574  | 164.7327489  |
| August 2025    | 116.5916222           | 83.05877416  | 150.1244703  | 65.30755667  | 167.8756878  |
| September 2025 | 119.7076093           | 85.2969692   | 154.1182493  | 67.08107669  | 172.3341419  |
| October 2025   | 116.4825217           | 81.18433825  | 151.7807051  | 62.49860867  | 170.4664347  |
| November 2025  | 119.72106             | 83.52573419  | 155.9163858  | 64.36508611  | 175.0770339  |
| December 2025  | 132.1092911           | 95.00736887  | 169.2112133  | 75.36679765  | 188.8517845  |
| January 2026   | 95.92706752           | 57.64332607  | 134.210809   | 37.37713754  | 154.4769975  |
| February 2026  | 114.3437219           | 75.14115925  | 153.5462846  | 54.38857614  | 174.2988677  |
| March 2026     | 114.6522837           | 74.52161143  | 154.7829561  | 53.27771676  | 176.0268507  |
| April 2026     | 126.4560962           | 85.38815753  | 167.5240348  | 63.64810403  | 189.2640883  |
| May 2026       | 129.6949142           | 87.68067853  | 171.7091498  | 65.43968565  | 193.9501427  |
| June 2026      | 128.1338488           | 85.16440608  | 171.1032915  | 62.41775714  | 193.8499404  |
| July 2026      | 118.1857681           | 74.25232393  | 162.1192123  | 50.99536344  | 185.3761727  |
| August 2026    | 120.001398            | 75.0952689   | 164.9075271  | 51.3234001   | 188.6793959  |
| September 2026 | 123.1173851           | 77.229994    | 169.0047761  | 52.9386765   | 193.2960936  |
| October 2026   | 119.8922975           | 73.01516973  | 166.7694252  | 48.1999173   | 191.5846776  |
| November 2026  | 123.1308358           | 75.25559511  | 171.0060765  | 49.91197358  | 196.349698   |
| December 2026  | 135.5190669           | 86.63743161  | 184.4007021  | 60.76105697  | 210.2770768  |
| January 2027   | 99.33684331           | 49.19854593  | 149.4751407  | 22.65693455  | 176.0167521  |
| February 2027  | 117.7534977           | 66.59735211  | 168.9096433  | 39.51692444  | 195.990071   |
| March 2027     | 118.0620595           | 65.87989451  | 170.2442246  | 38.25632496  | 197.8677941  |
| April 2027     | 129.865872            | 76.64960461  | 183.0821393  | 48.47861436  | 211.2531296  |
| May 2027       | 133.10469             | 78.8463226   | 187.3630573  | 50.12367792  | 216.085702   |
| June 2027      | 131.5436246           | 76.23524175  | 186.8520074  | 46.95675246  | 216.1304967  |
| July 2027      | 121.5955439           | 65.22930968  | 177.9617781  | 35.39082769  | 207.8002601  |
| August 2027    | 123.4111738           | 65.97932915  | 180.8430184  | 35.57674708  | 211.2456005  |
| September 2027 | 126.5271608           | 68.0220211   | 185.0323006  | 37.05127091  | 216.0030508  |
| October 2027   | 123.3020732           | 63.71602572  | 182.8881208  | 32.17307752  | 214.431069   |
| November 2027  | 126.5406116           | 65.86611339  | 187.2151098  | 33.74697422  | 219.3342489  |
| December 2027  | 138.9288427           | 77.15841854  | 200.6992668  | 44.45913122  | 233.3985541  |

**Table S3.** Result of Holt-Winters Exponential Smoothing Method for Araceli (cont'n.).

| Month & Year   | Forecasted Data |             |             |              |             |
|----------------|-----------------|-------------|-------------|--------------|-------------|
|                | Point Forecast  | Lo.80       | Hi.80       | Lo.95        | Hi.95       |
| January 2028   | 102.7466191     | 39.64945069 | 165.8437875 | 6.24782738   | 199.2454108 |
| February 2028  | 121.1632735     | 56.95928818 | 185.3672588 | 22.97175138  | 219.3547956 |
| March 2028     | 121.4718353     | 56.15364173 | 186.7900289 | 21.57627871  | 221.3673919 |
| April 2028     | 133.2756477     | 66.83591857 | 199.7153769 | 31.66485047  | 234.886445  |
| May 2028       | 136.5144658     | 68.94593586 | 204.0829957 | 33.17731674  | 239.8516148 |
| June 2028      | 134.9534004     | 66.24886498 | 203.6579357 | 29.8788809   | 240.0279198 |
| July 2028      | 125.0053197     | 55.15763278 | 194.8530066 | 18.18250084  | 231.8281385 |
| August 2028    | 126.8209496     | 55.82302226 | 197.8188769 | 18.23898981  | 235.4029094 |
| September 2028 | 129.9369366     | 57.78173552 | 202.0921378 | 19.58507933  | 240.288794  |
| October 2028   | 126.711849      | 53.39239483 | 200.0313032 | 14.5794203   | 238.8442778 |
| November 2028  | 129.9503874     | 55.4597535  | 204.4410212 | 16.0267939   | 243.8739808 |
| December 2028  | 142.3386184     | 66.66992965 | 218.0073072 | 26.61334544  | 258.0638915 |
| January 2029   | 106.1563949     | 29.09446531 | 183.2183245 | -11.69965602 | 224.0124458 |
| February 2029  | 124.5730493     | 46.32263614 | 202.8234624 | 4.899369603  | 244.246729  |
| March 2029     | 124.8816111     | 45.43590761 | 204.3273146 | 3.379892585  | 246.3833296 |
| April 2029     | 136.6854235     | 56.03767196 | 217.3331751 | 13.34533112  | 260.0255159 |
| May 2029       | 139.9242416     | 58.06773203 | 221.7807511 | 14.73551339  | 265.1129697 |
| June 2029      | 138.3631762     | 55.2912455  | 221.4351068 | 11.31562178  | 265.4107305 |
| July 2029      | 128.4150955     | 44.12112608 | 212.7090648 | -0.501405863 | 257.3315968 |
| August 2029    | 130.2307254     | 44.70814421 | 215.7533065 | -0.564775533 | 261.0262263 |
| September 2029 | 133.3467124     | 46.58898991 | 220.1044349 | 0.662225843  | 266.031199  |
| October 2029   | 130.1216248     | 42.12227392 | 218.1209757 | -4.461768511 | 264.7050181 |
| November 2029  | 133.3601632     | 44.11273842 | 222.6075879 | -3.131994393 | 269.8523207 |
| December 2029  | 145.7483942     | 55.24649087 | 236.2502976 | 7.337677182  | 284.1591113 |
| January 2030   | 109.5661707     | 17.60749193 | 201.5248494 | -31.07249205 | 250.2048334 |
| February 2030  | 127.9828251     | 34.75963989 | 221.2060103 | -14.58973338 | 270.5553835 |
| March 2030     | 128.2913869     | 33.79734866 | 222.7854251 | -16.22477357 | 272.8075474 |
| April 2030     | 140.0951993     | 44.32400054 | 235.8663981 | -6.374209652 | 286.5646083 |
| May 2030       | 143.3340173     | 46.27938877 | 240.3886459 | -5.0982281   | 291.7662628 |
| June 2030      | 141.7729519     | 43.42866184 | 240.117242  | -8.631660607 | 292.1775645 |
| July 2030      | 131.8248713     | 32.18472457 | 231.4650179 | -20.56158292 | 284.2113254 |
| August 2030    | 133.6405012     | 32.69833883 | 234.5826635 | -20.73721411 | 288.0182164 |
| September 2030 | 136.7564882     | 34.5061864  | 239.00679   | -9.62185374  | 293.1348302 |
| October 2030   | 133.5314006     | 29.96687007 | 237.0959311 | -24.85688074 | 291.919682  |
| November 2030  | 136.7699389     | 31.88512433 | 241.6547536 | -23.63754266 | 297.1774206 |
| December 2030  | 149.15817       | 42.94704921 | 255.3692908 | -13.27772186 | 311.5940619 |

**Table S3.** Result of Holt-Winters Exponential Smoothing Method for Balabac.

| Month & Year   | Forecasted Data |             |             |             |             |
|----------------|-----------------|-------------|-------------|-------------|-------------|
|                | Point Forecast  | Lo.80       | Hi.80       | Lo.95       | Hi.95       |
| January 2022   | 79.82432659     | 75.08019769 | 84.56845549 | 72.56880755 | 87.07984563 |
| February 2022  | 82.60502004     | 77.74743977 | 87.46260032 | 75.1759921  | 90.03404799 |
| March 2022     | 83.91925485     | 78.93001889 | 88.90849081 | 76.28887691 | 91.54963279 |
| April 2022     | 93.06419909     | 87.92475045 | 98.20364774 | 85.20409068 | 100.9243075 |
| May 2022       | 94.32688167     | 89.01854273 | 99.63522061 | 86.20847784 | 102.4452855 |
| June 2022      | 93.9055345      | 88.40971148 | 99.40135751 | 85.50039852 | 102.3106705 |
| July 2022      | 88.06558253     | 82.36393692 | 93.76722815 | 79.34566805 | 96.78549702 |
| August 2022    | 92.70122686     | 86.77581177 | 98.62664196 | 83.63908649 | 101.7633672 |
| September 2022 | 92.73776848     | 86.57113082 | 98.90440614 | 83.30671003 | 102.1688269 |
| October 2022   | 90.26403569     | 83.83928698 | 96.68878441 | 80.43823045 | 100.0898409 |
| November 2022  | 92.8794413      | 86.18030124 | 99.57858135 | 82.63399071 | 103.1248919 |
| December 2022  | 91.07066139     | 84.08147905 | 98.05984373 | 80.38162941 | 101.7596934 |
| January 2023   | 90.98846037     | 83.44186491 | 98.53505583 | 79.44693859 | 102.5299821 |
| February 2023  | 93.76915382     | 85.91335767 | 101.62495   | 81.75475038 | 105.7835573 |
| March 2023     | 95.08338863     | 86.90420221 | 103.262575  | 82.57440246 | 107.5923748 |
| April 2023     | 104.2283329     | 95.71212595 | 112.7445398 | 91.20391833 | 117.2527474 |
| May 2023       | 105.4910154     | 96.62469671 | 114.3573342 | 91.93115109 | 119.0508798 |
| June 2023      | 105.0696683     | 95.84066081 | 114.2986757 | 90.95511937 | 119.1842172 |
| July 2023      | 99.22971631     | 89.62593068 | 108.8335019 | 84.54199366 | 113.917439  |
| August 2023    | 103.8653606     | 93.87516684 | 113.8555544 | 88.5866777  | 119.1440436 |
| September 2023 | 103.9019023     | 93.51410146 | 114.2897031 | 88.01513188 | 119.7886726 |
| October 2023   | 101.4281695     | 90.63196627 | 112.2243727 | 84.91680152 | 117.9395374 |
| November 2023  | 104.0435751     | 92.82855068 | 115.2585995 | 86.89167539 | 121.1954748 |
| December 2023  | 102.2347952     | 90.5908819  | 113.8787084 | 84.42696654 | 120.0426238 |
| January 2024   | 102.1525941     | 89.84562517 | 114.4595631 | 83.33070932 | 120.974479  |
| February 2024  | 104.9332876     | 92.186139   | 117.6804362 | 85.43820614 | 124.4283691 |
| March 2024     | 106.2475224     | 93.0506553  | 119.4443895 | 86.06465585 | 126.430389  |
| April 2024     | 115.3924667     | 101.7366253 | 129.048308  | 94.50765958 | 136.2772737 |
| May 2024       | 116.6551492     | 102.5313428 | 130.7789556 | 95.05465139 | 138.2556471 |
| June 2024      | 116.2338021     | 101.6332877 | 130.8343164 | 93.90424231 | 138.5633618 |
| July 2024      | 110.3938501     | 95.30811695 | 125.4795832 | 87.32221221 | 133.465488  |
| August 2024    | 115.0294944     | 99.45024896 | 130.6087399 | 91.20309458 | 138.8558943 |
| September 2024 | 115.066036      | 98.98518847 | 131.1468836 | 90.47250198 | 139.6595701 |
| October 2024   | 112.5923033     | 96.00195493 | 129.1826516 | 87.21955503 | 137.9650515 |
| November 2024  | 115.2077089     | 98.1001406  | 132.3152771 | 89.04394101 | 141.3714767 |
| December 2024  | 113.3989289     | 95.76659029 | 131.0312676 | 86.43259404 | 140.3652639 |

*Table S3. Result of Holt-Winters Exponential Smoothing Method for Balabac (cont'n.).*

| Month & Year   | Forecasted Data |             |             |             |             |
|----------------|-----------------|-------------|-------------|-------------|-------------|
|                | Point Forecast  | Lo.80       | Hi.80       | Lo.95       | Hi.95       |
| January 2025   | 113.3167279     | 94.95504908 | 131.6784068 | 85.23496344 | 141.3984924 |
| February 2025  | 116.0974214     | 97.20196631 | 134.9928765 | 87.19931661 | 144.9955262 |
| March 2025     | 117.4116562     | 97.97508109 | 136.8482313 | 87.68597975 | 147.1373326 |
| April 2025     | 126.5566004     | 106.5717076 | 146.5414933 | 95.99234433 | 157.1208565 |
| May 2025       | 127.819283      | 107.2790128 | 148.3595533 | 96.4056505  | 159.2329155 |
| June 2025      | 127.3979358     | 106.2953594 | 148.5005123 | 95.12433016 | 159.6715415 |
| July 2025      | 121.5579839     | 99.88629624 | 143.2296715 | 88.41399781 | 154.7019699 |
| August 2025    | 126.1936282     | 103.9461421 | 148.4411143 | 92.16903432 | 160.2182221 |
| September 2025 | 126.2301698     | 103.4003095 | 149.0600301 | 91.31491145 | 161.1454282 |
| October 2025   | 123.756437      | 100.3377329 | 147.1751411 | 87.94061985 | 159.5722542 |
| November 2025  | 126.3718426     | 102.3579263 | 150.385759  | 89.64572682 | 163.0979584 |
| December 2025  | 124.5630627     | 99.94766178 | 149.1784637 | 86.91705564 | 162.2090698 |
| January 2026   | 124.4808617     | 99.08137863 | 149.8803448 | 85.63570448 | 163.3260189 |
| February 2026  | 127.2615552     | 101.2524769 | 153.2706334 | 87.48410256 | 167.0390078 |
| March 2026     | 128.57579       | 101.9509541 | 155.2006258 | 87.85661737 | 169.2949626 |
| April 2026     | 137.7207342     | 110.4740657 | 164.9674027 | 96.05055065 | 179.3909178 |
| May 2026       | 138.9834168     | 111.1089242 | 166.8579094 | 96.35305914 | 181.6137744 |
| June 2026      | 138.5620696     | 110.0538415 | 167.0702977 | 94.96249719 | 182.161642  |
| July 2026      | 132.7221176     | 103.5743194 | 161.8699159 | 88.14440707 | 177.2998282 |
| August 2026    | 137.357762      | 107.5646325 | 167.1508915 | 91.79310242 | 182.9224215 |
| September 2026 | 137.3943036     | 106.9501524 | 167.8384548 | 90.83399226 | 183.9546149 |
| October 2026   | 134.9205708     | 103.8197753 | 166.0213663 | 87.35600873 | 182.4851329 |
| November 2026  | 137.5359764     | 105.7729794 | 169.2989734 | 88.95866444 | 186.1132884 |
| December 2026  | 135.7271965     | 103.2965035 | 168.1578896 | 86.12873158 | 185.3256614 |
| January 2027   | 135.6449955     | 102.3805655 | 168.9094254 | 84.77143999 | 186.518551  |
| February 2027  | 138.4256889     | 104.485964  | 172.3654139 | 86.51935889 | 190.332019  |
| March 2027     | 139.7399237     | 105.1194826 | 174.3603649 | 86.79252811 | 192.6873194 |
| April 2027     | 148.884868      | 113.578348  | 184.191388  | 94.88820533 | 202.8815306 |
| May 2027       | 150.1475506     | 114.1496457 | 186.1454555 | 95.0935059  | 205.2015952 |
| June 2027      | 149.7262034     | 113.031662  | 186.4207447 | 93.60674522 | 205.8456616 |
| July 2027      | 143.8862514     | 106.4898748 | 181.282628  | 86.6934289  | 201.079074  |
| August 2027    | 148.5218958     | 110.4185362 | 186.6252553 | 90.24783605 | 206.7959555 |
| September 2027 | 148.5584374     | 109.7429964 | 187.3738784 | 89.19534311 | 207.9215316 |
| October 2027   | 146.0847046     | 106.5521315 | 185.6172776 | 85.62485147 | 206.5445577 |
| November 2027  | 148.7001102     | 108.4454007 | 188.9548197 | 87.13584471 | 210.2643757 |
| December 2027  | 146.8913303     | 105.9095249 | 187.8731357 | 84.21506756 | 209.567593  |



**Table S3.** Result of Holt-Winters Exponential Smoothing Method for Balabac (cont'n.).

| Month & Year   | Forecasted Data |             |             |             |             |
|----------------|-----------------|-------------|-------------|-------------|-------------|
|                | Point Forecast  | Lo.80       | Hi.80       | Lo.95       | Hi.95       |
| January 2028   | 146.8091293     | 104.9470907 | 188.6711678 | 82.78666608 | 210.8315924 |
| February 2028  | 149.5898227     | 106.9934626 | 192.1861829 | 84.44431158 | 214.7353338 |
| March 2028     | 150.9040575     | 107.568472  | 194.2396431 | 84.62799871 | 217.1801163 |
| April 2028     | 160.0490018     | 115.9693295 | 204.1286741 | 92.6349605  | 227.463043  |
| May 2028       | 161.3116843     | 116.4831052 | 206.1402634 | 92.75228893 | 229.8710798 |
| June 2028      | 160.8903372     | 115.3080712 | 206.4726031 | 91.17827721 | 230.6023971 |
| July 2028      | 155.0503852     | 108.7096914 | 201.391079  | 84.17840988 | 225.9223605 |
| August 2028    | 159.6860295     | 112.5822046 | 206.7898544 | 87.64694596 | 231.7251131 |
| September 2028 | 159.7225712     | 111.8509489 | 207.5941934 | 86.50924282 | 232.9358995 |
| October 2028   | 157.2488384     | 108.6047883 | 205.8928884 | 82.85418365 | 231.6434931 |
| November 2028  | 159.864244      | 110.4431706 | 209.2853173 | 84.2812347  | 235.4472532 |
| December 2028  | 158.0554641     | 107.852806  | 208.2581221 | 81.27712416 | 234.833804  |
| January 2029   | 157.973263      | 106.8462545 | 209.1002716 | 79.78125104 | 236.165275  |
| February 2029  | 160.7539565     | 108.8384443 | 212.6694687 | 81.35603228 | 240.1518807 |
| March 2029     | 162.0681913     | 109.3596595 | 214.7767231 | 81.45744828 | 242.6789343 |
| April 2029     | 171.2131355     | 117.7071008 | 224.7191703 | 89.3827169  | 253.0435542 |
| May 2029       | 172.4758181     | 118.1678286 | 226.7838076 | 89.41891557 | 255.5327207 |
| June 2029      | 172.0544709     | 116.940106  | 227.1688359 | 87.7643236  | 256.3446183 |
| July 2029      | 166.214519      | 110.2893882 | 222.1396498 | 80.6844122  | 251.7446258 |
| August 2029    | 170.8501633     | 114.1099057 | 227.590421  | 84.07342765 | 257.626899  |
| September 2029 | 170.8867049     | 113.3269884 | 228.4464214 | 82.85671506 | 258.9166948 |
| October 2029   | 168.4129721     | 110.0294929 | 226.7964514 | 79.12314591 | 257.7027984 |
| November 2029  | 171.0283777     | 111.8168595 | 230.239896  | 80.47217517 | 261.5845803 |
| December 2029  | 169.2195978     | 109.1757914 | 229.2634043 | 77.3905202  | 261.0486755 |
| January 2030   | 169.1373968     | 108.1270876 | 230.1477061 | 75.83018077 | 262.4446129 |
| February 2030  | 171.9180903     | 110.0688398 | 233.7673408 | 77.3278243  | 266.5083562 |
| March 2030     | 173.2323251     | 110.5399227 | 235.9247275 | 77.3525695  | 269.1120807 |
| April 2030     | 182.3772693     | 118.8375302 | 245.9170084 | 85.20162415 | 279.5529145 |
| May 2030       | 183.6399519     | 119.2487168 | 248.031187  | 85.16205596 | 282.1178478 |
| June 2030      | 183.2186047     | 117.9717391 | 248.4654703 | 83.43213489 | 283.0050746 |
| July 2030      | 177.3786528     | 111.2720466 | 243.485259  | 76.27732312 | 278.4799824 |
| August 2030    | 182.0142971     | 115.043864  | 248.9847302 | 79.59185826 | 284.4367359 |
| September 2030 | 182.0508387     | 114.2125159 | 249.8891615 | 78.30107706 | 285.8006004 |
| October 2030   | 179.5771059     | 110.8668534 | 248.2873584 | 74.4938429  | 284.6603689 |
| November 2030  | 182.1925115     | 112.6063119 | 251.7787111 | 75.76960298 | 288.6154201 |
| December 2030  | 180.3837316     | 109.9175895 | 250.8498737 | 72.61506713 | 288.1523961 |

**Table S3.** Result of Holt-Winters Exponential Smoothing Method for Cuyo.

| Month & Year   | Forecasted Data |             |             |             |             |
|----------------|-----------------|-------------|-------------|-------------|-------------|
|                | Point Forecast  | Lo.80       | Hi.80       | Lo.95       | Hi.95       |
| January 2022   | 592.5745403     | 556.2806235 | 628.868457  | 537.0677846 | 648.081296  |
| February 2022  | 608.7865109     | 571.6246593 | 645.9483625 | 551.9523634 | 665.6206585 |
| March 2022     | 608.9881202     | 570.8190657 | 647.1571747 | 550.6135887 | 667.3626516 |
| April 2022     | 685.6771666     | 646.3589429 | 724.9953903 | 625.5451326 | 745.8092006 |
| May 2022       | 724.6623011     | 684.0520193 | 765.2725829 | 662.5542347 | 786.7703675 |
| June 2022      | 720.3085132     | 678.2639256 | 762.3531007 | 656.0068654 | 784.6101609 |
| July 2022      | 683.3202897     | 639.7011015 | 726.9394779 | 616.6104981 | 750.0300813 |
| August 2022    | 700.925399      | 655.5943115 | 746.2564865 | 631.5974833 | 770.2533146 |
| September 2022 | 717.2508546     | 670.0743469 | 764.4273624 | 645.1006122 | 789.401097  |
| October 2022   | 668.0916923     | 618.9405626 | 717.242822  | 592.9215263 | 743.2618584 |
| November 2022  | 683.8672033     | 632.6169028 | 735.1175037 | 605.4866326 | 762.2477739 |
| December 2022  | 671.5179405     | 618.0487353 | 724.9871458 | 589.7438478 | 753.2920333 |
| January 2023   | 643.5331875     | 585.7996155 | 701.2667594 | 555.2373086 | 731.8290663 |
| February 2023  | 659.7451581     | 599.6461141 | 719.8442022 | 567.831602  | 751.6587143 |
| March 2023     | 659.9467674     | 597.3736971 | 722.5198377 | 564.2495146 | 755.6440202 |
| April 2023     | 736.6358138     | 671.4844422 | 801.7871854 | 636.9953894 | 836.2762382 |
| May 2023       | 775.6209483     | 707.7911231 | 843.4507735 | 671.8841827 | 879.357714  |
| June 2023      | 771.2671604     | 700.6626646 | 841.8716561 | 663.2869023 | 879.2474184 |
| July 2023      | 734.2789369     | 660.8072831 | 807.7505907 | 621.913739  | 846.6441348 |
| August 2023    | 751.8840462     | 675.4562615 | 828.3118309 | 634.9978362 | 868.7702562 |
| September 2023 | 768.2095018     | 688.7399121 | 847.6790916 | 646.6712525 | 889.7477512 |
| October 2023   | 719.0503395     | 636.4563569 | 801.6443222 | 592.7337435 | 845.3669356 |
| November 2023  | 734.8258505     | 649.0277682 | 820.6239327 | 603.609007  | 866.0426939 |
| December 2023  | 722.4765877     | 633.3973853 | 811.5557902 | 586.2417039 | 858.7114716 |
| January 2024   | 694.4918347     | 600.3400701 | 788.6435993 | 550.4991365 | 838.4845328 |
| February 2024  | 710.7038053     | 613.1845432 | 808.2230675 | 561.5609641 | 859.8466466 |
| March 2024     | 710.9054146     | 609.9456798 | 811.8651495 | 556.5008245 | 865.3100047 |
| April 2024     | 787.594461      | 683.1234445 | 892.0654775 | 627.8198291 | 947.3690929 |
| May 2024       | 826.5795955     | 718.5285152 | 934.6306758 | 661.3297285 | 991.8294626 |
| June 2024      | 822.2258076     | 710.5277777 | 933.9238374 | 651.3984125 | 993.0532027 |
| July 2024      | 785.2375841     | 669.8274942 | 900.647674  | 608.7330831 | 961.7420851 |
| August 2024    | 802.8426934     | 683.6570958 | 922.0282909 | 620.5640517 | 985.1213351 |
| September 2024 | 819.168149      | 696.1451547 | 942.1911433 | 631.0207154 | 1007.315583 |
| October 2024   | 770.0089868     | 643.0881688 | 896.9298047 | 575.9003462 | 964.1176273 |
| November 2024  | 785.7844977     | 654.9068021 | 916.6621933 | 585.6243351 | 985.9446602 |
| December 2024  | 773.435235      | 638.5428987 | 908.3275713 | 567.1352092 | 979.7352607 |

**Table S3.** *Result of Holt-Winters Exponential Smoothing Method for Cuyo (cont'n.).*

| Month & Year   | Forecasted Data       |              |              |              |              |
|----------------|-----------------------|--------------|--------------|--------------|--------------|
|                | <i>Point Forecast</i> | <i>Lo.80</i> | <i>Hi.80</i> | <i>Lo.95</i> | <i>Hi.95</i> |
| January 2025   | 745.4504819           | 604.9784885  | 885.9224752  | 530.6171071  | 960.2838567  |
| February 2025  | 761.6624526           | 617.1069214  | 906.2179837  | 540.5838456  | 982.7410595  |
| March 2025     | 761.8640618           | 613.1688107  | 910.559313   | 534.4542995  | 989.2738241  |
| April 2025     | 838.5531082           | 685.6630723  | 991.4431441  | 604.7279763  | 1072.37824   |
| May 2025       | 877.5382427           | 720.3994141  | 1034.677071  | 637.215143   | 1117.861342  |
| June 2025      | 873.1844548           | 711.7438258  | 1034.625084  | 626.2823191  | 1120.08659   |
| July 2025      | 836.1962313           | 670.4017424  | 1001.99072   | 582.6354416  | 1089.757021  |
| August 2025    | 853.8013406           | 683.6018317  | 1024.00085   | 593.503654   | 1114.099027  |
| September 2025 | 870.1267962           | 695.4719613  | 1044.781631  | 603.0152766  | 1137.238316  |
| October 2025   | 820.967634            | 641.8079791  | 1000.127289  | 546.9665868  | 1094.968681  |
| November 2025  | 836.7431449           | 653.0299491  | 1020.456341  | 555.7780578  | 1117.708232  |
| December 2025  | 824.3938822           | 636.0791607  | 1012.708604  | 536.3913688  | 1112.396395  |
| January 2026   | 796.4091291           | 602.0959594  | 990.7222988  | 499.2327809  | 1093.585477  |
| February 2026  | 812.6210998           | 613.6443559  | 1011.597844  | 508.3124304  | 1116.929769  |
| March 2026     | 812.822709            | 609.1352468  | 1016.510171  | 501.3096176  | 1124.3358    |
| April 2026     | 889.5117554           | 681.067099   | 1097.956412  | 570.7231633  | 1208.300348  |
| May 2026       | 928.4968899           | 715.2492032  | 1141.744577  | 602.3626968  | 1254.631083  |
| June 2026      | 924.143102            | 706.0471611  | 1142.239043  | 590.5941439  | 1257.69206   |
| July 2026      | 887.1548785           | 664.1660465  | 1110.143711  | 546.1228893  | 1228.186868  |
| August 2026    | 904.7599878           | 676.8341907  | 1132.685785  | 556.177562   | 1253.342414  |
| September 2026 | 921.0854435           | 688.1791477  | 1153.991739  | 564.8860023  | 1277.284885  |
| October 2026   | 871.9262812           | 633.9964726  | 1109.85609   | 508.0440401  | 1235.808522  |
| November 2026  | 887.7017921           | 644.7059559  | 1130.697628  | 516.0717303  | 1259.331854  |
| December 2026  | 875.3525294           | 627.2486312  | 1123.456428  | 495.9103611  | 1254.794698  |
| January 2027   | 847.3677763           | 592.885557   | 1101.849996  | 458.1708075  | 1236.564745  |
| February 2027  | 863.579747            | 603.9313316  | 1123.228162  | 466.4817632  | 1260.677731  |
| March 2027     | 863.7813562           | 598.925271   | 1128.637441  | 458.7189287  | 1268.843784  |
| April 2027     | 940.4704026           | 670.3656219  | 1210.575183  | 527.3807881  | 1353.560017  |
| May 2027       | 979.4555372           | 704.0614678  | 1254.849607  | 558.2766537  | 1400.634421  |
| June 2027      | 975.1017492           | 694.3782156  | 1255.825283  | 545.7721535  | 1404.431345  |
| July 2027      | 938.1135257           | 652.0207558  | 1224.206296  | 500.5723917  | 1375.65466   |
| August 2027    | 955.718635            | 664.2172469  | 1247.220023  | 509.9057332  | 1401.531537  |
| September 2027 | 972.0440907           | 675.0950799  | 1268.993101  | 517.8997691  | 1426.188412  |
| October 2027   | 922.8849284           | 620.4496562  | 1225.320201  | 460.350094   | 1385.419763  |
| November 2027  | 938.6604393           | 630.7006209  | 1246.620258  | 467.6765406  | 1409.644338  |
| December 2027  | 926.3111766           | 612.7888705  | 1239.833483  | 446.820187   | 1405.802166  |

**Table S3.** Result of Holt-Winters Exponential Smoothing Method for Cuyo (cont'n.).

| Month & Year   | Forecasted Data |             |             |             |             |
|----------------|-----------------|-------------|-------------|-------------|-------------|
|                | Point Forecast  | Lo.80       | Hi.80       | Lo.95       | Hi.95       |
| January 2028   | 898.3264235     | 578.0700868 | 1218.58276  | 408.5366228 | 1388.116224 |
| February 2028  | 914.5383942     | 588.6642913 | 1240.412497 | 416.1569617 | 1412.919827 |
| March 2028     | 914.7400034     | 583.210619  | 1246.269388 | 407.7095641 | 1421.770443 |
| April 2028     | 991.4290498     | 654.2071932 | 1328.650907 | 475.6927255 | 1507.165374 |
| May 2028       | 1030.414184     | 687.4629805 | 1373.365388 | 505.9155796 | 1554.912789 |
| June 2028      | 1026.060396     | 677.3432768 | 1374.777516 | 492.7435845 | 1559.377208 |
| July 2028      | 989.072173      | 634.5528673 | 1343.591479 | 446.8816832 | 1531.262663 |
| August 2028    | 1006.677282     | 646.3198098 | 1367.034755 | 455.558087  | 1557.796477 |
| September 2028 | 1023.002738     | 656.7714002 | 1389.234076 | 462.9002409 | 1583.105235 |
| October 2028   | 973.8435756     | 601.7029486 | 1345.984203 | 404.7036004 | 1542.983551 |
| November 2028  | 989.6190865     | 611.5340135 | 1367.70416  | 411.3878658 | 1567.850307 |
| December 2028  | 977.2698238     | 593.2054086 | 1361.334239 | 389.8939884 | 1564.645659 |
| January 2029   | 949.2850707     | 558.149115  | 1340.421026 | 351.0942472 | 1547.475894 |
| February 2029  | 965.4970414     | 568.3288118 | 1362.665271 | 358.0806512 | 1572.913432 |
| March 2029     | 965.6986506     | 562.4635988 | 1368.933703 | 349.0038564 | 1582.393445 |
| April 2029     | 1042.387697     | 633.0515233 | 1451.723871 | 416.3620422 | 1668.413352 |
| May 2029       | 1081.372832     | 665.9014793 | 1496.844184 | 445.9642309 | 1716.781432 |
| June 2029      | 1077.019044     | 655.3786932 | 1498.659394 | 432.1757743 | 1721.862313 |
| July 2029      | 1040.03082      | 612.1878832 | 1467.873757 | 385.7015134 | 1694.360127 |
| August 2029    | 1057.635929     | 623.5570437 | 1491.714815 | 393.769562  | 1721.502297 |
| September 2029 | 1073.961385     | 633.6134091 | 1514.309361 | 400.5072715 | 1747.415499 |
| October 2029   | 1024.802223     | 578.1522309 | 1471.452215 | 341.7100076 | 1707.894438 |
| November 2029  | 1040.577734     | 587.5930114 | 1493.562456 | 347.7973843 | 1733.358083 |
| December 2029  | 1028.228471     | 568.87651   | 1487.580432 | 325.7102704 | 1730.746672 |
| January 2030   | 1000.243718     | 533.4977398 | 1466.989696 | 286.4173439 | 1714.070092 |
| February 2030  | 1016.455689     | 543.2915745 | 1489.619803 | 292.8136227 | 1740.097754 |
| March 2030     | 1016.657298     | 537.042835  | 1496.271761 | 283.1502749 | 1750.164321 |
| April 2030     | 1093.346344     | 607.2495183 | 1579.44317  | 349.9254024 | 1836.767286 |
| May 2030       | 1132.331479     | 639.7204695 | 1624.942488 | 378.9479533 | 1885.715004 |
| June 2030      | 1127.977691     | 628.8208684 | 1627.134513 | 364.5832079 | 1891.372174 |
| July 2030      | 1090.989467     | 585.2553881 | 1596.723547 | 317.5359382 | 1864.442997 |
| August 2030    | 1108.594577     | 596.2519795 | 1620.937174 | 325.0341916 | 1892.154962 |
| September 2030 | 1124.920032     | 605.9378352 | 1643.902229 | 331.2052554 | 1918.634809 |
| October 2030   | 1075.76087      | 550.1081663 | 1601.413574 | 271.8444336 | 1879.677306 |
| November 2030  | 1091.536381     | 559.1824361 | 1623.890326 | 277.3712806 | 1905.701481 |
| December 2030  | 1079.187118     | 540.1013663 | 1618.27287  | 254.7266074 | 1903.647629 |

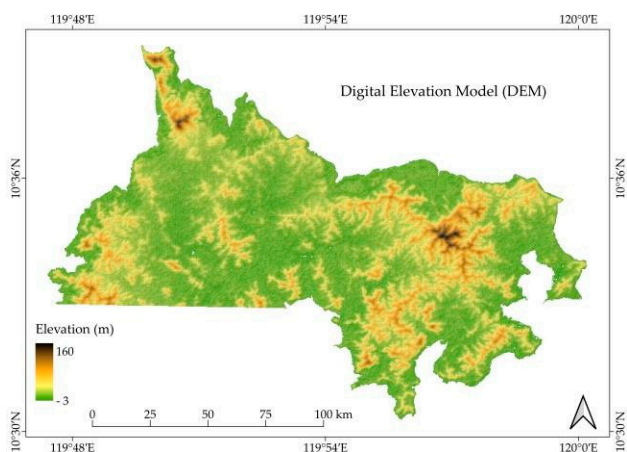

(a)

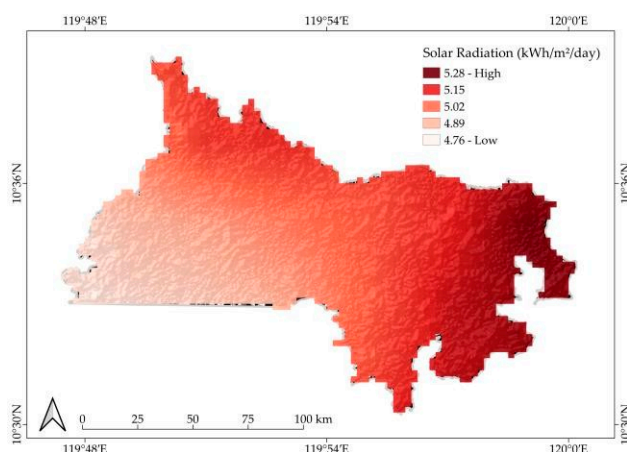

(b)

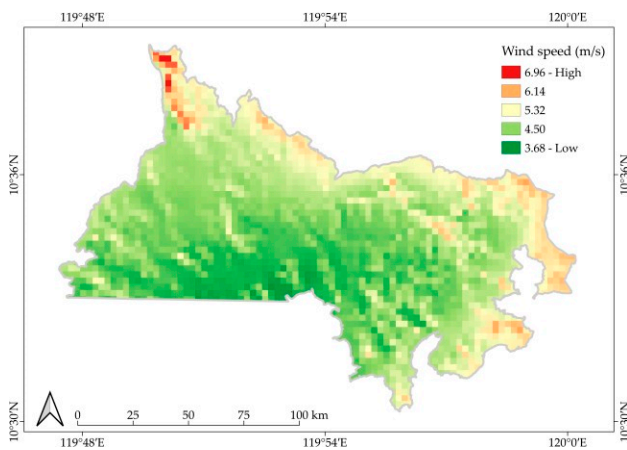

(c)

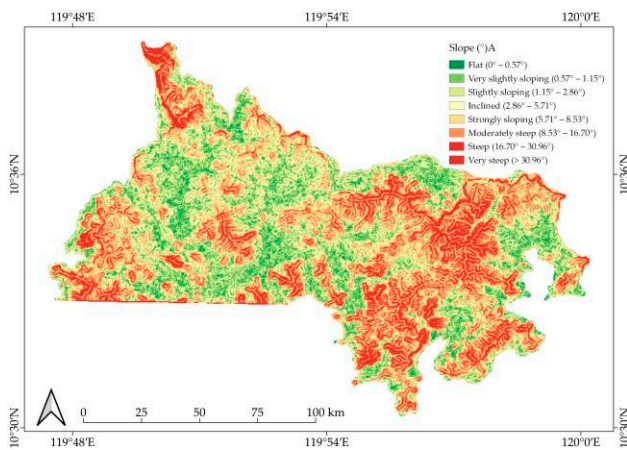

(d)

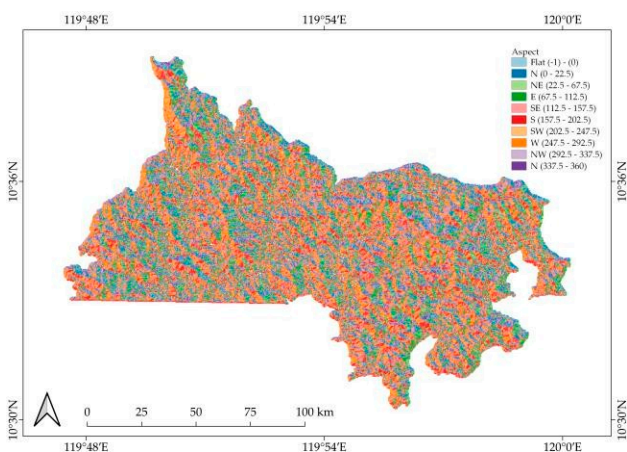

(e)

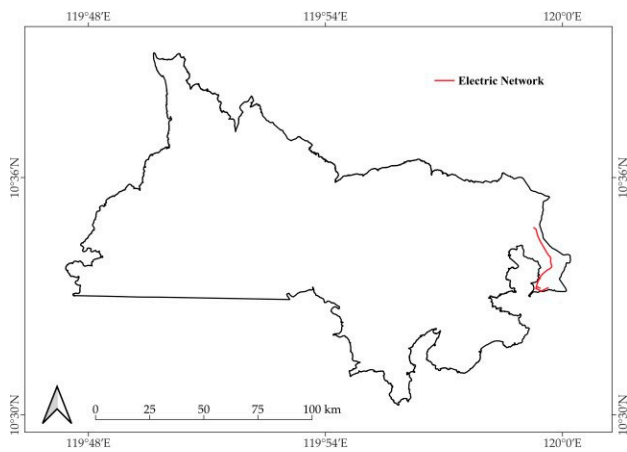

(f)

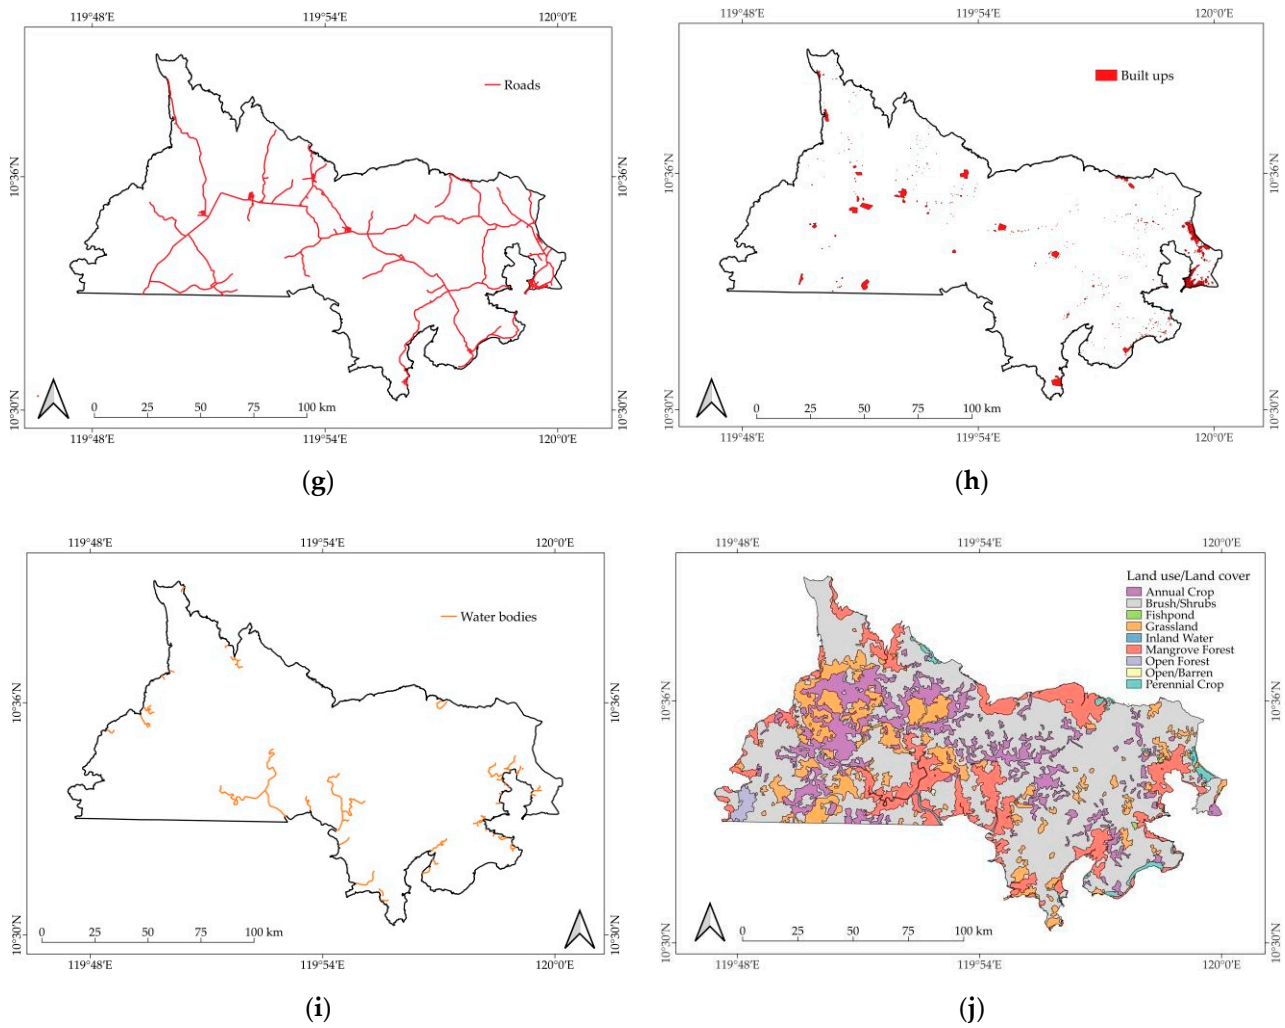

**Figure S1.** GIS maps before the application of exclusion criteria and constraints. Araceli: a) DEM; b) GHI; c) wind speed; d) slope; e) aspect; f) electric network; g) roads; h) built-ups; i) water bodies; j) land use/land cover.

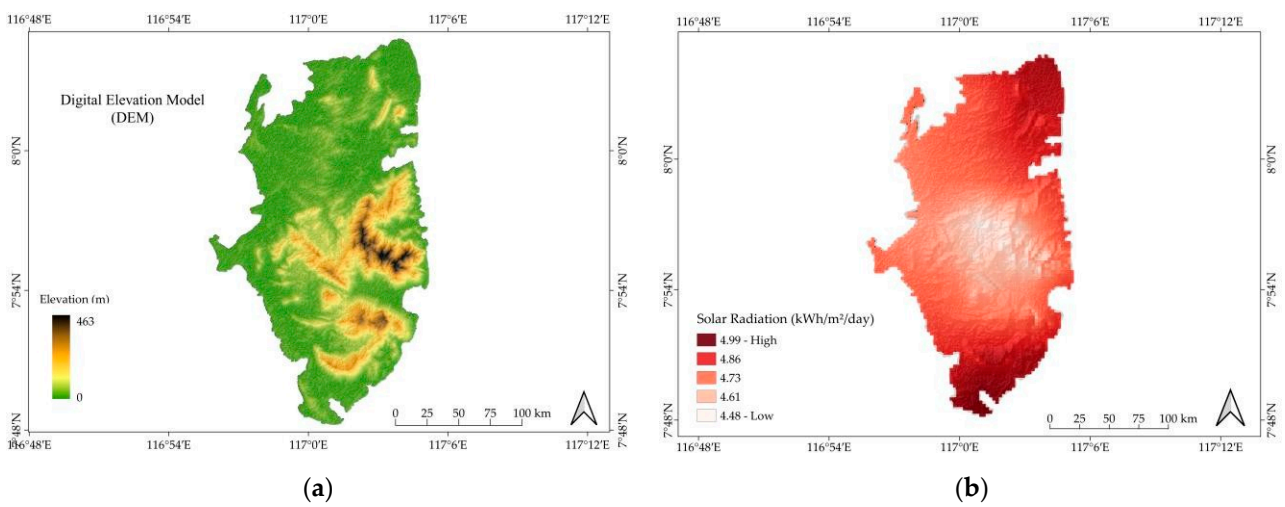



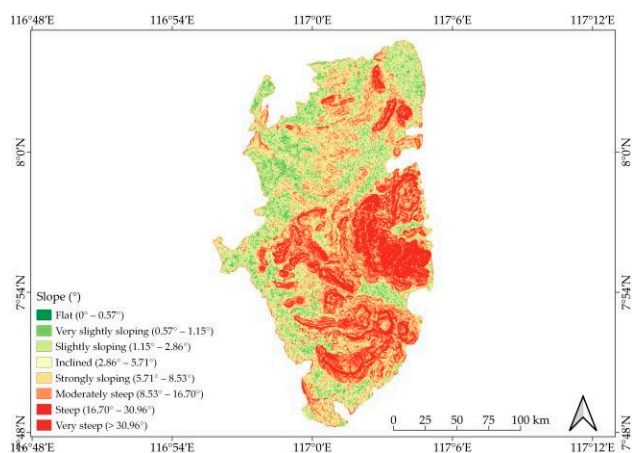

(c)

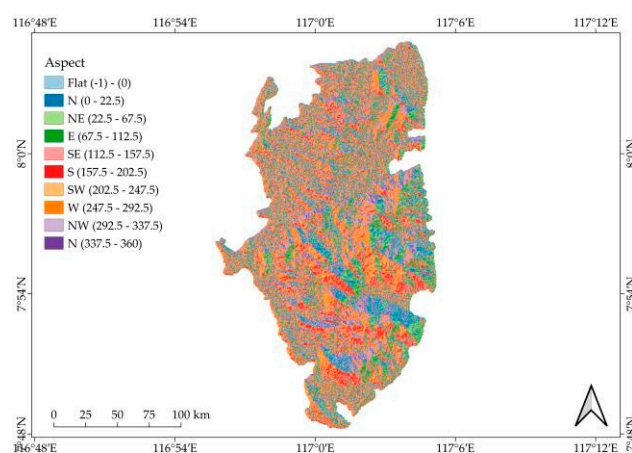

(d)

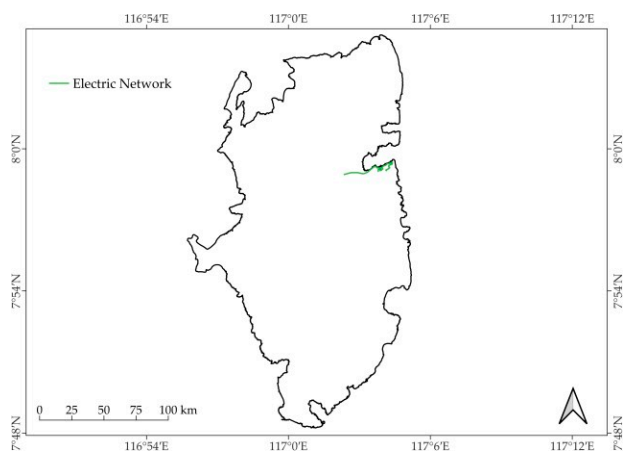

(e)

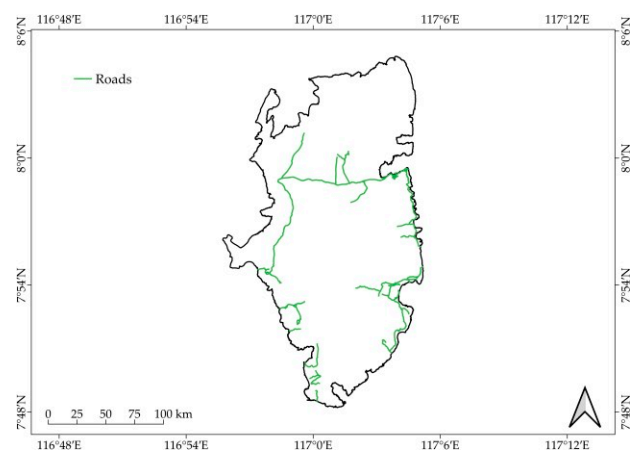

(f)

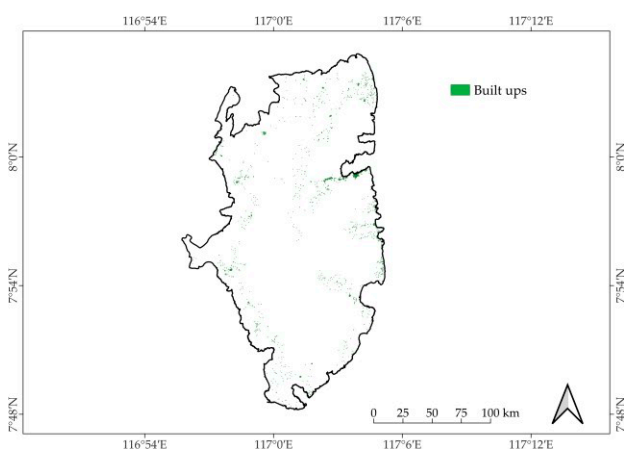

(g)

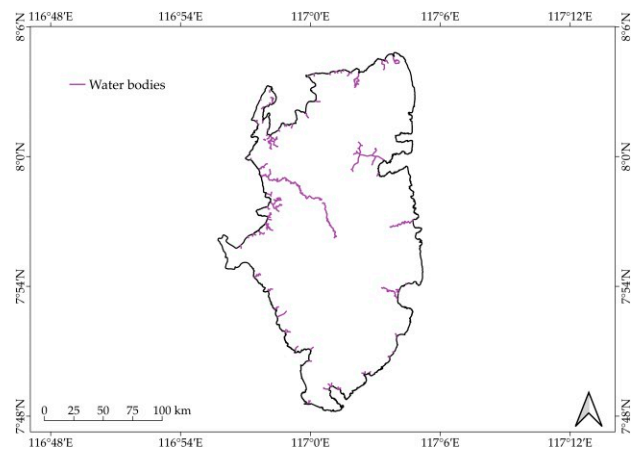

(h)

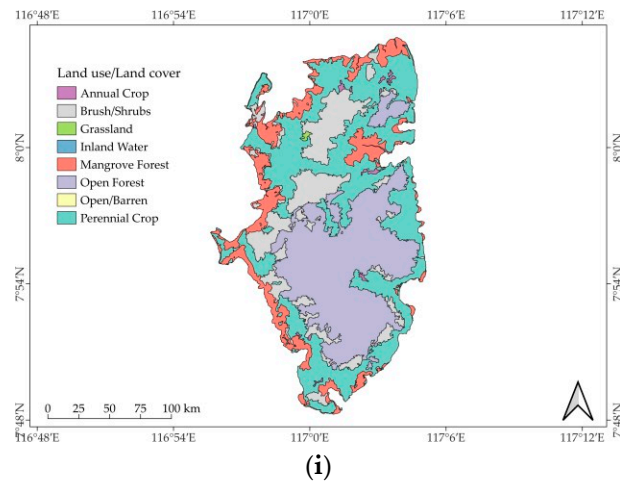

**Figure S2.** Balabac: a) DEM; b) GHI; c) slope; d) aspect; e) electric network; f) roads; g) built-ups; h) water bodies; i) land use/land cover.

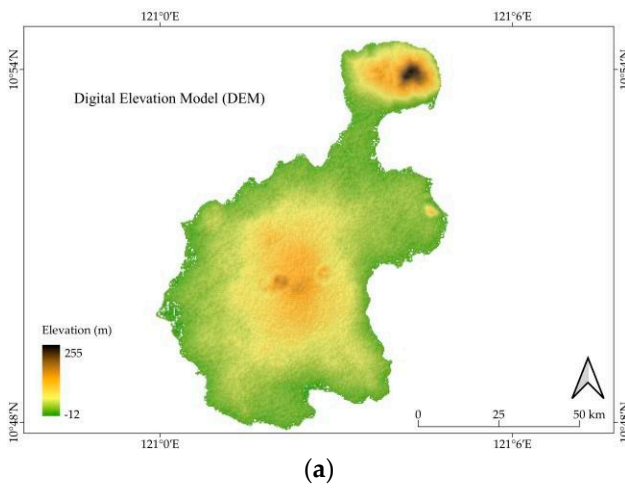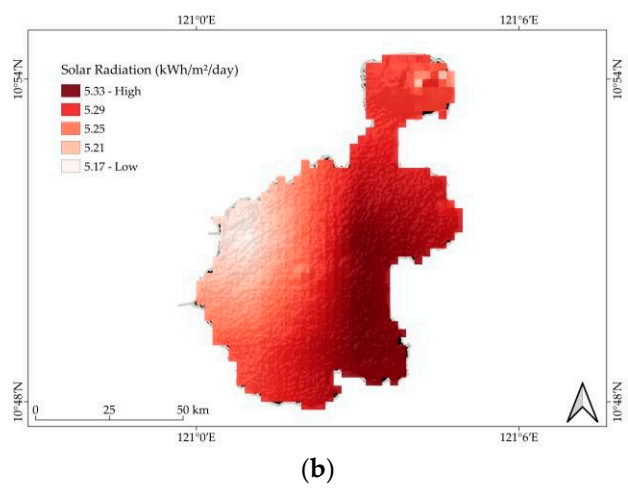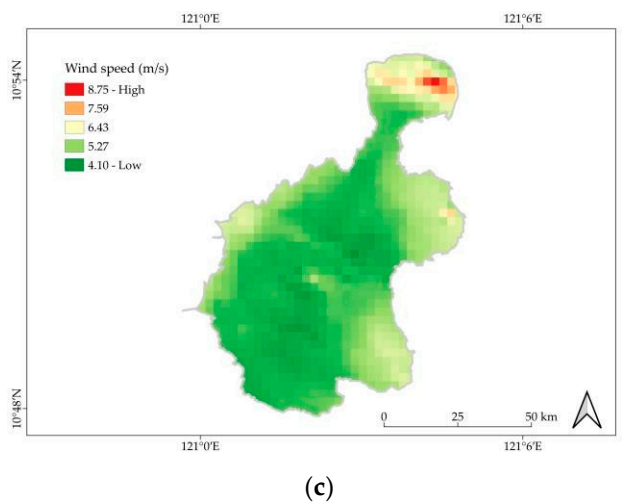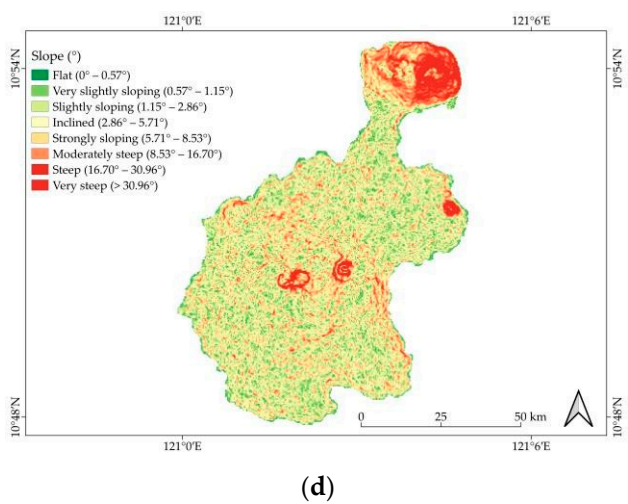



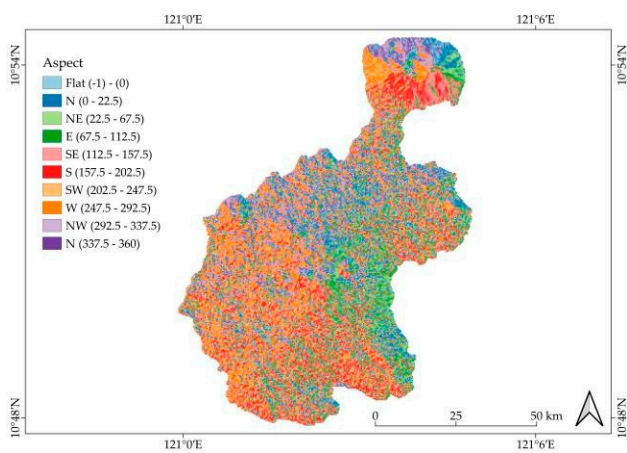

(e)

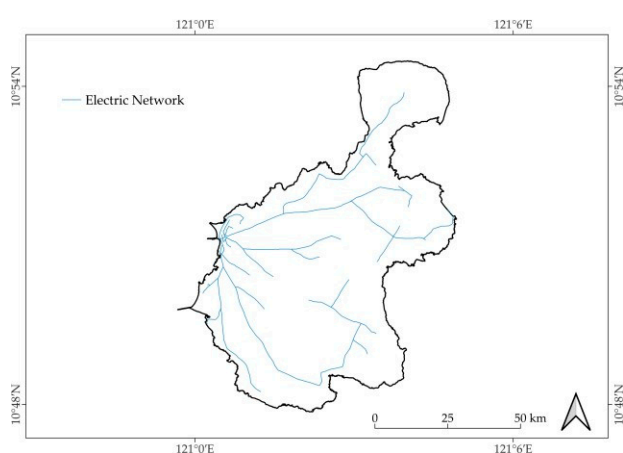

(f)

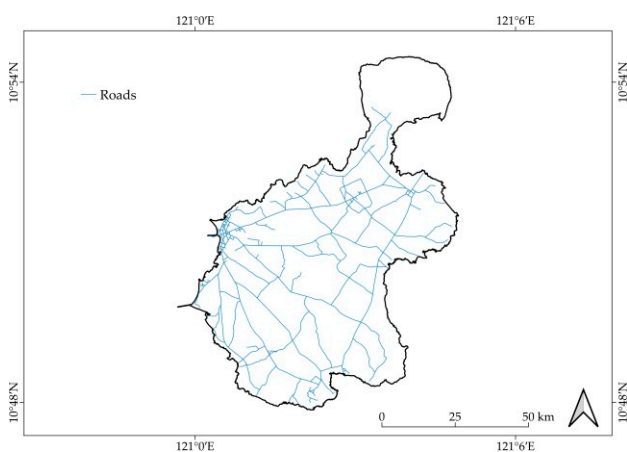

(g)

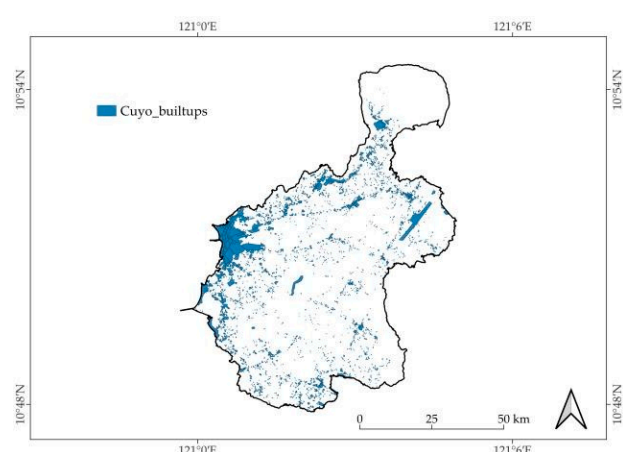

(h)

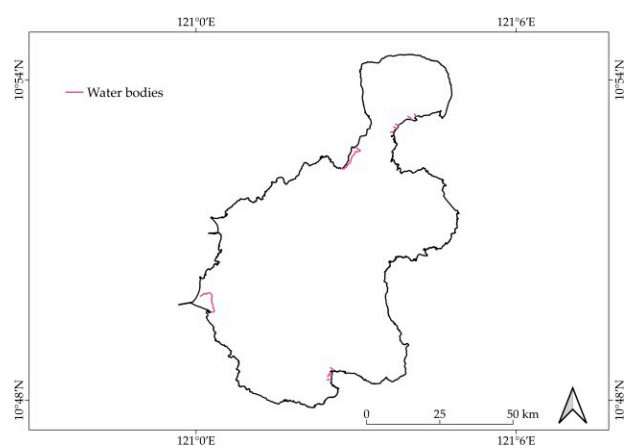

(i)

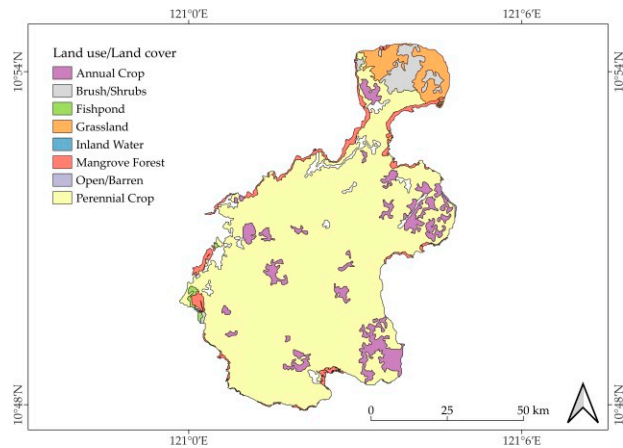

(j)

**Figure S3.** Cuyo: a) DEM; b) GHI; c) wind speed; d) slope; e) aspect; f) electric network; g) roads; h) built-ups; i) water bodies; j) land use/land cover.

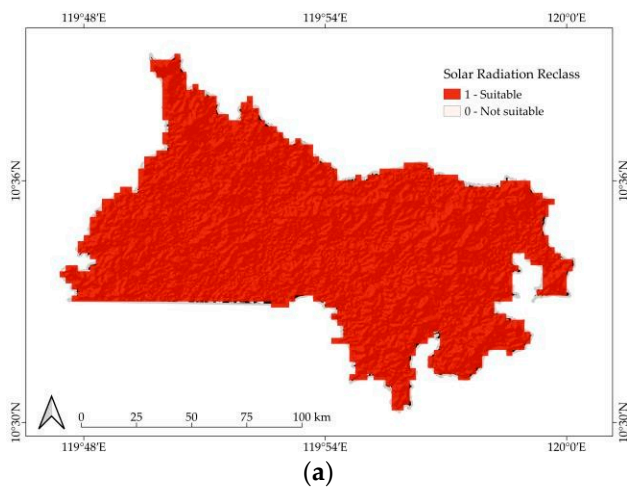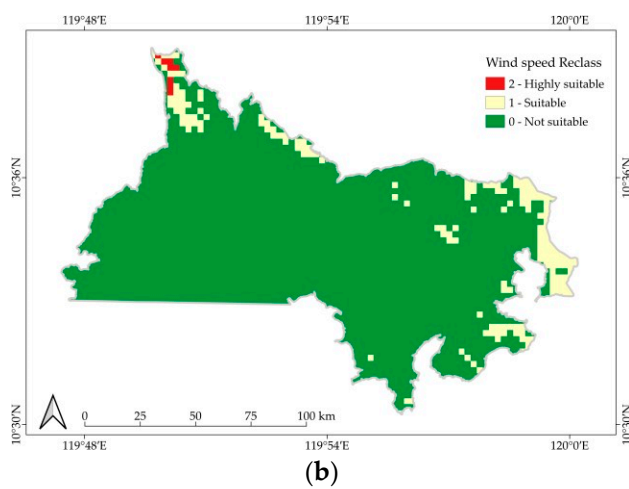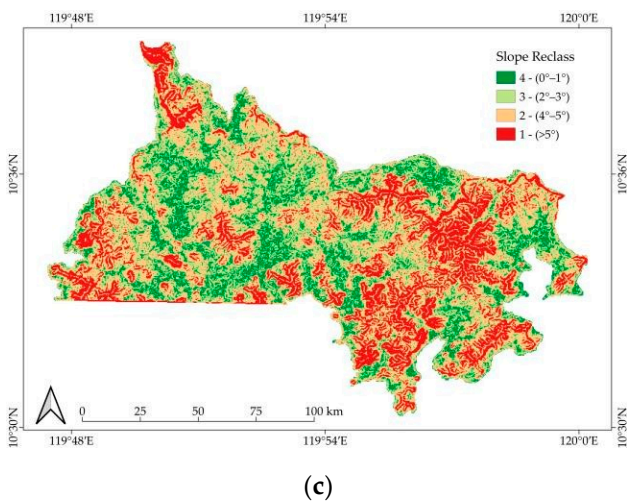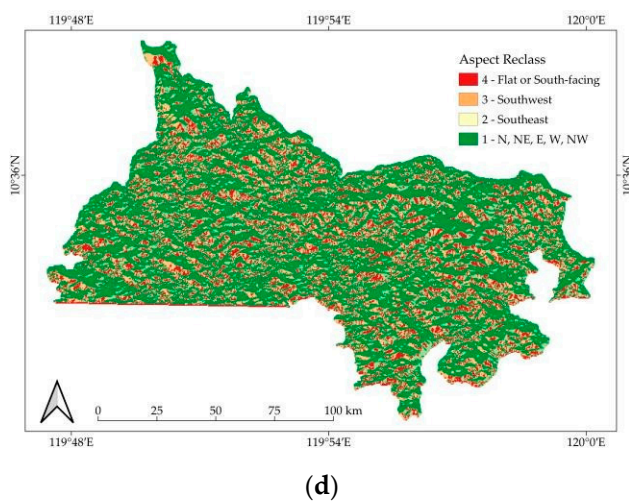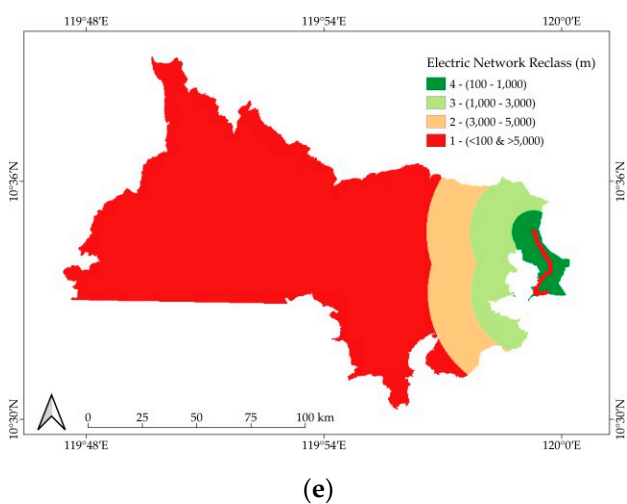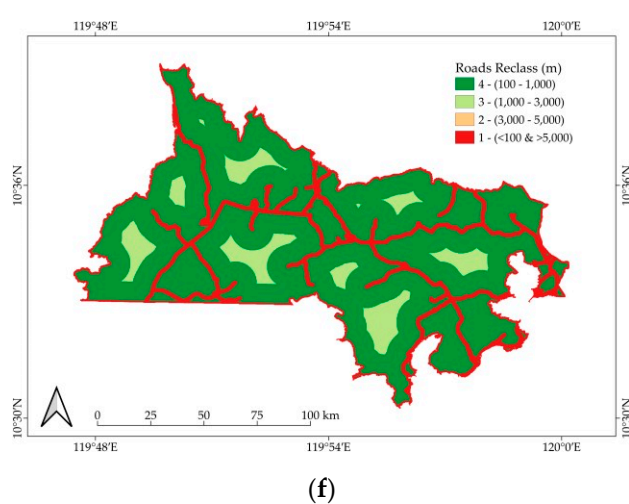

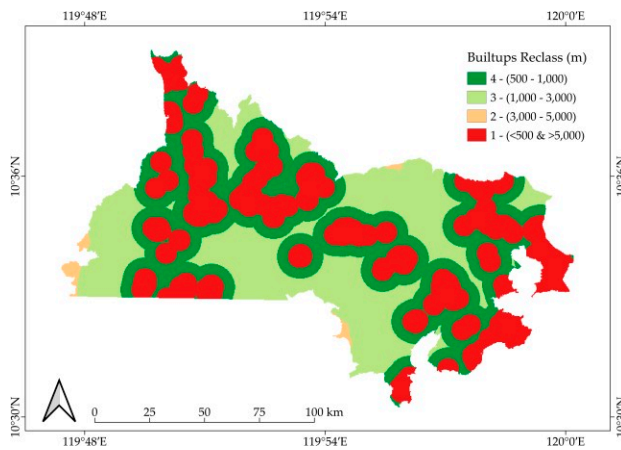

(g)

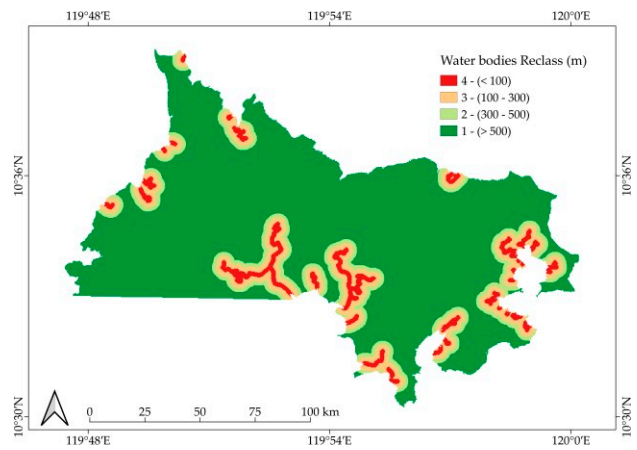

(h)

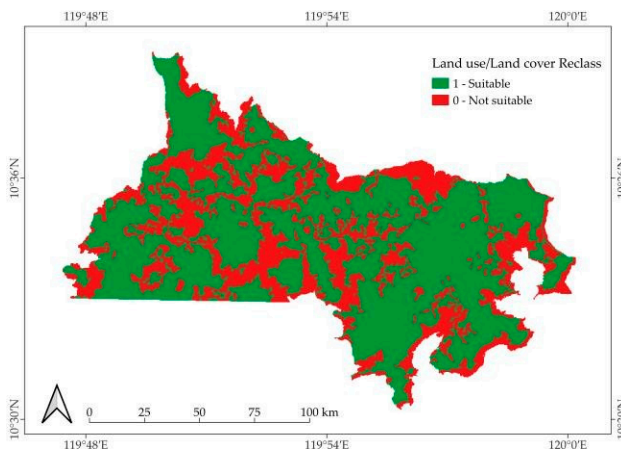

(i)

**Figure S4.** GIS reclassification maps. Reclassification of datasets in Araceli: a) GHI; b) wind speed; c) slope; d) aspect; e) electric network; f) roads; g) builtups; h) water bodies; and i) land use/land cover.

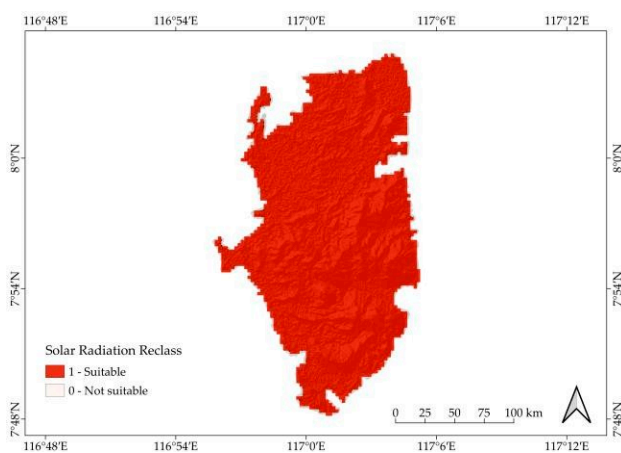

(a)

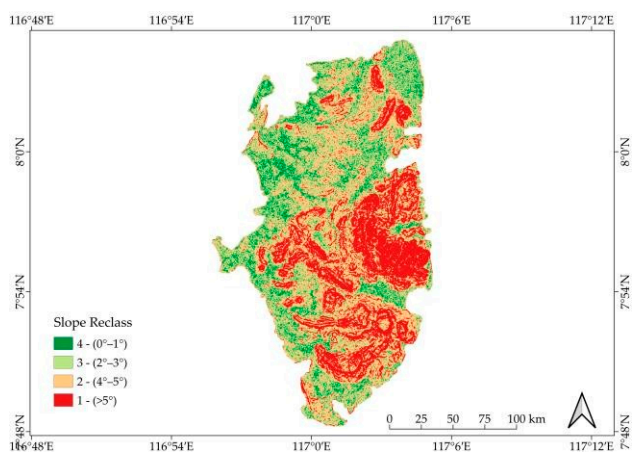

(b)

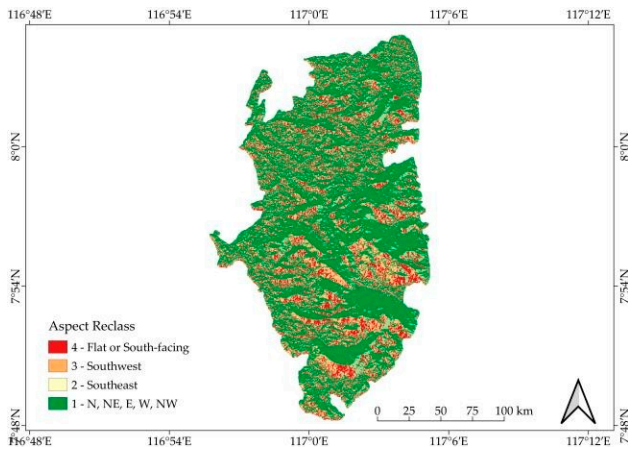

(c)

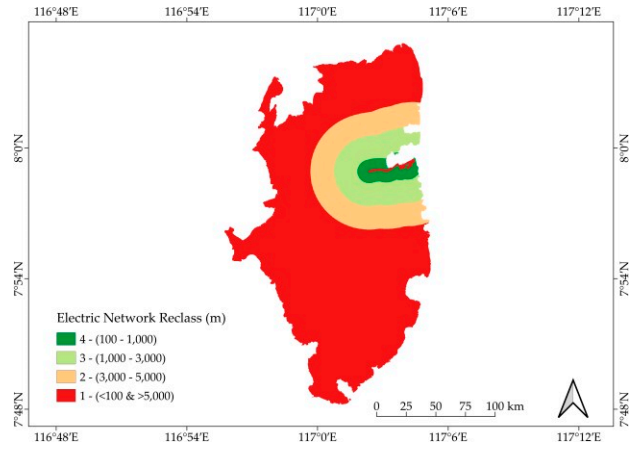

(d)

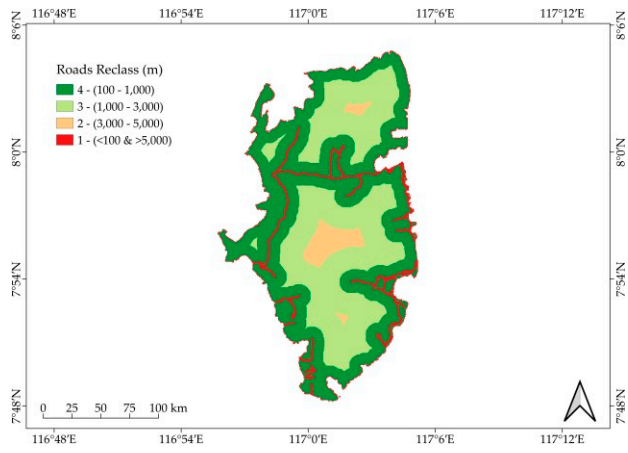

(e)

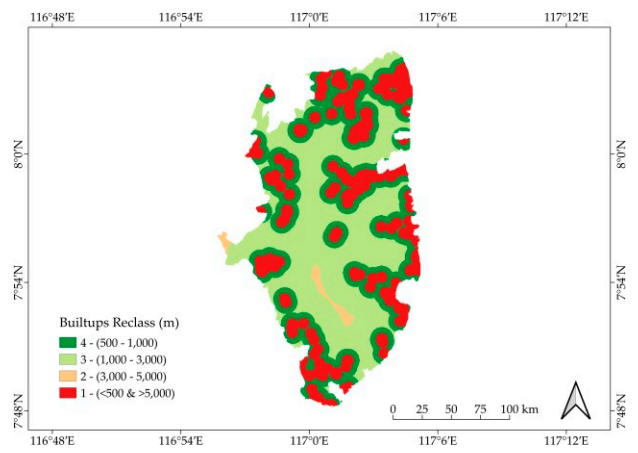

(f)

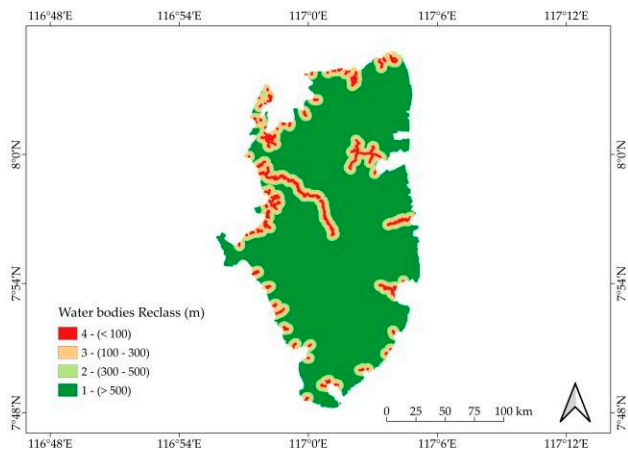

(g)

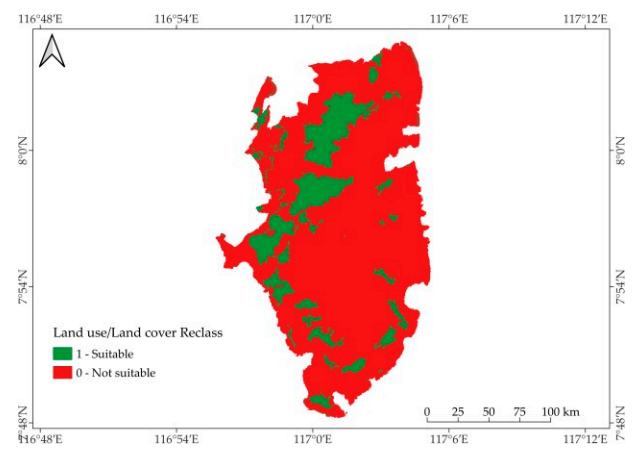

(h)

**Figure S5.** Reclassification of datasets in Balabac: a) GHI; b) slope; c) aspect; d) electric network; e) roads; f) built ups; g) water bodies, and h) land use/land cover.



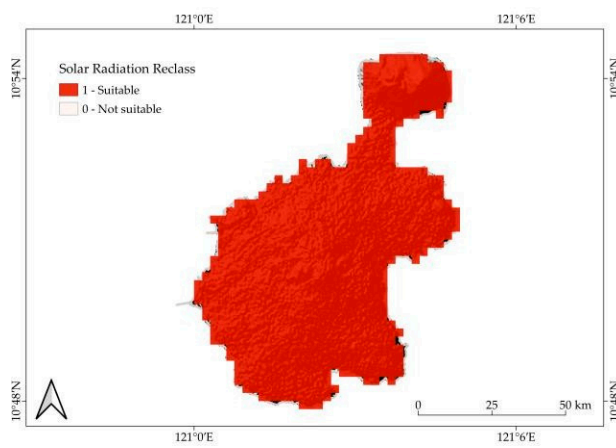

(a)

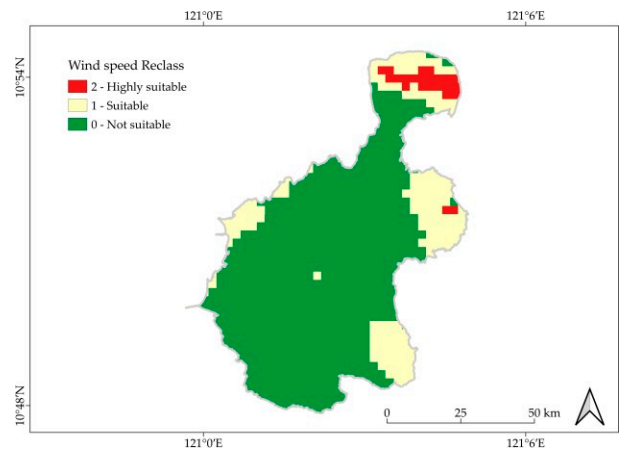

(b)

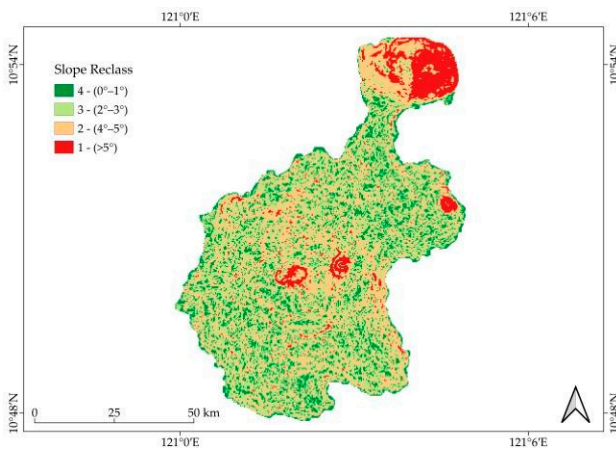

(c)

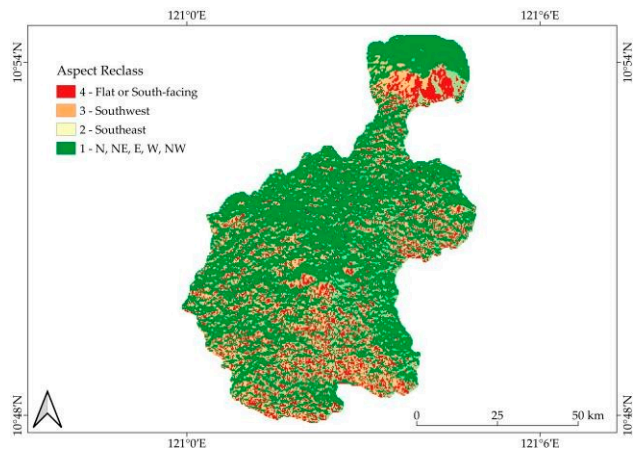

(d)

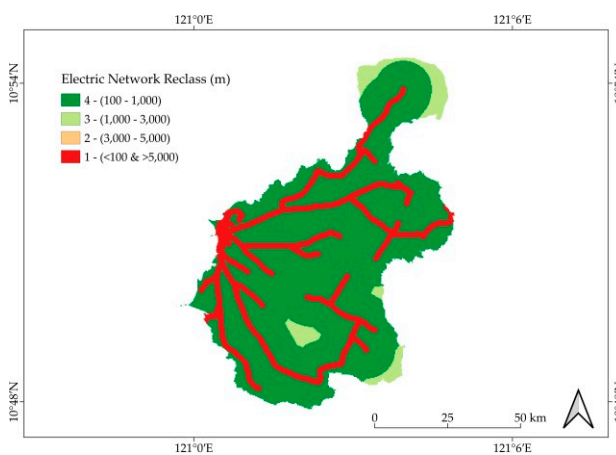

(e)

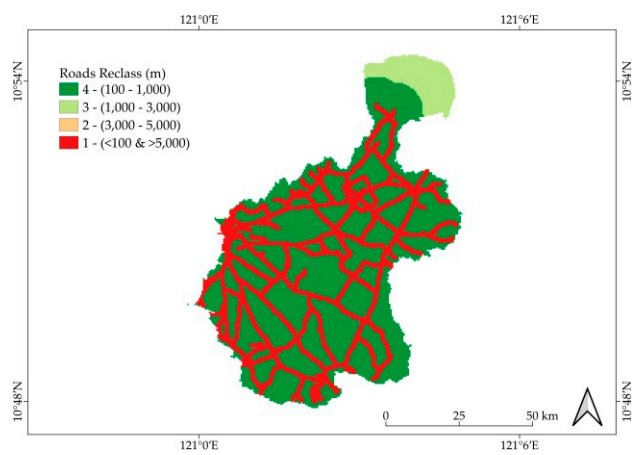

(f)

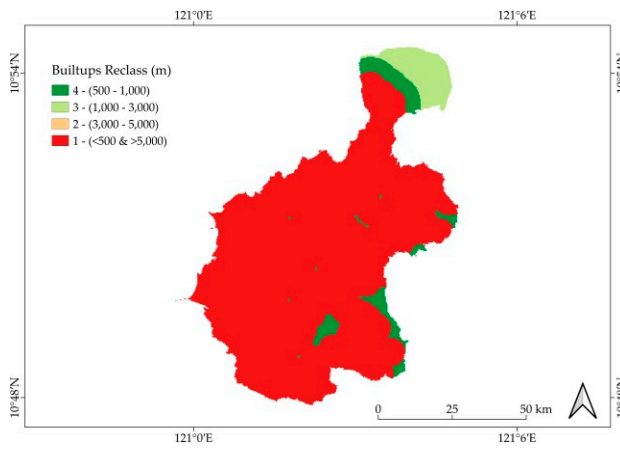

(g)

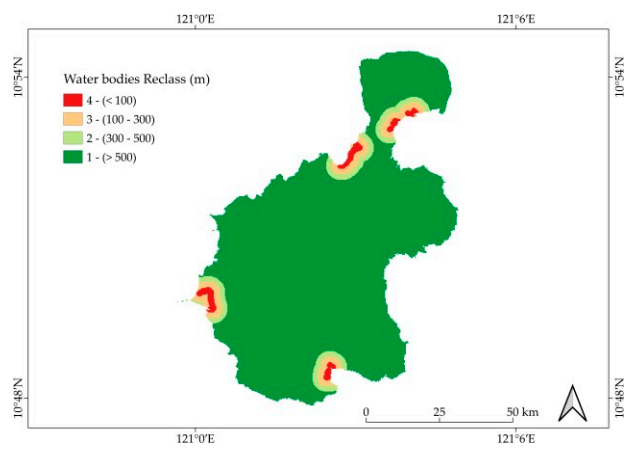

(h)

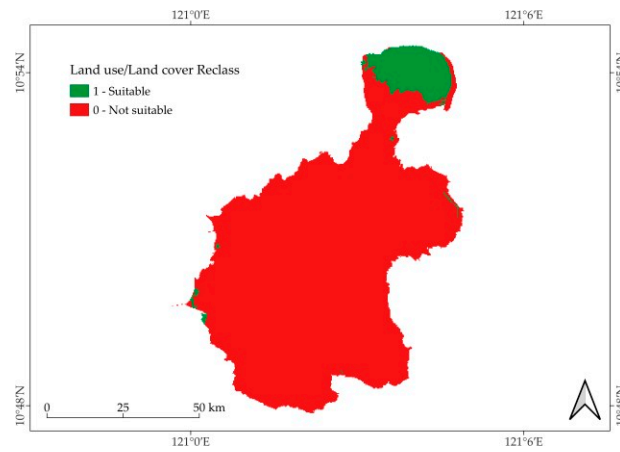

(i)

**Figure S6.** Reclassification of datasets in Cuyo: a) GHI; b) wind speed; c) slope; d) aspect; e) electric network; f) roads; g) builtups; h) water bodies; and i) land use/land cover.
